# Supplementary material for: Extrapolation performance improvement by quantum chemical calculations for machine-learning-based predictions of flow-synthesized binary copolymers
Source: Royal Society of Chemistry journal article supplement (doi:10.1039/d2dd00144f), 2023-01-01
Supplement: d2dd00144f1.pdf [file d2dd00144f1.pdf]

## Electronic Supplementary Information (ESI)

### Extrapolation performance improvement by quantum chemical calculations for machine-learning-based predictions of flow-synthesized binary copolymers

Shogo Takasuka,<sup>a</sup> Shunto Oikawa,<sup>a</sup> Takayoshi Yoshimura,<sup>c</sup> Sho Ito,<sup>a</sup> Yosuke Harashima,<sup>a</sup> Tomoaki Takayama,<sup>a</sup> Shigehito Asano,<sup>b</sup> Akira Kurosawa,<sup>b</sup> Tetsunori Sugawara,<sup>b</sup> Miho Hatanaka,<sup>c</sup> Tomoyuki Miyao,<sup>a</sup> Takamitsu Matsubara,<sup>a</sup> Yuya Ohnishi,<sup>b</sup> Hiroharu Ajiro<sup>a</sup> and Mikiya Fujii<sup>\*a</sup>

<sup>a</sup> *Nara Institute of Science and Technology, 8916-5 Takayama-cho, Ikoma, Nara 630-0192, Japan*

<sup>b</sup> *JSR Corporation, Shiodome Sumitomo Bldg., 1-9-2, Higashi-Shimbashi, Minato-ku, Tokyo 105-8640, Japan*

<sup>c</sup> *Keio University, 4-1-1 Hiyoshi, Kohoku-ku, Yokohama-shi, Kanagawa 223-8521, Japan*

E-mail: [fujii.mikiya@ms.naist.jp](mailto:fujii.mikiya@ms.naist.jp)

## Flow synthesis reactor:

**Table S1.** List of flow reactor components.

| Part name                                                | Product number    | Manufacturer                 |
|----------------------------------------------------------|-------------------|------------------------------|
| Screw cap bottle 4 port cap set                          | 017270-3A         | SIBATA SCIENTIFIC TECHNOLOGY |
| Medium bottle                                            | FB-800-500        | Fisher Scientific            |
| Stainless steel cooling bath                             | HPS-100           | AS ONE Corporation           |
| Magnetic stirrer                                         | HS-30DN           | AS ONE Corporation           |
| PFA Tubing $\phi$ 3.17 (1/8) $\times$ $\phi$ 1.59 (1/16) | NSP66-3.17X1.59-1 | GUNZE LIMITED                |
| Plunger pump                                             | FC-F-PP-410S      | Device for FlowChemistry     |
| Feral                                                    | YMC-P-0012        | YMC                          |
| Connector                                                | YMC-P-0002        | YMC                          |
| Mixer housing                                            | YMC-P-0030-02     | YMC                          |
| Micro mixer                                              | KC-M-Y-GL         | YMC                          |
| Inline temperature sensor                                | FC-TCK-SW1.6      | Device for FlowChemistry     |
| PFA Tubing 2 $\times$ 3 $\phi$                           | TOMBO No.9003-PFA | NICHIAS Corporation          |
| Oil bath                                                 | NWB-250           | NISSIN                       |
| Powerful magnetic stirrer                                | F-205D            | Tokyo Garasu Kikai           |

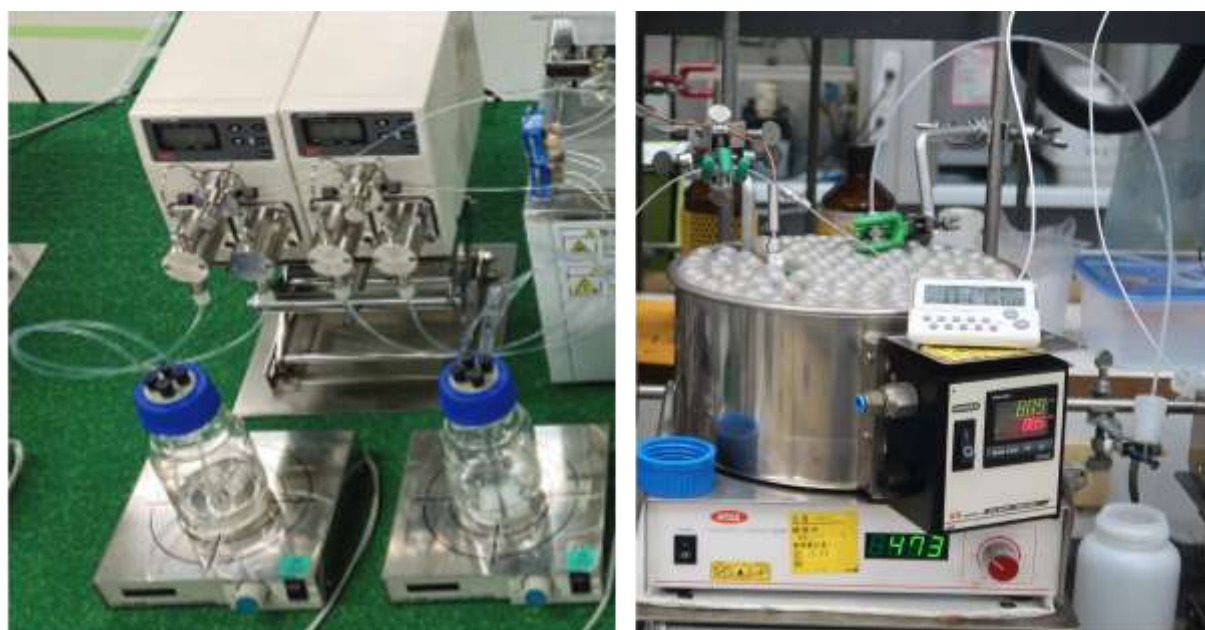

**Figure S1.** Photographs of flow reactor setup.

## Reagents

Methyl methacrylate (MMA), glycidyl methacrylate (GMA), styrene (St), tetrahydrofurfuryl methacrylate (THFMA), and 2,2'-azobis(2,4-dimethylvaleronitrile) were purchased from FUJIFILM Wako (Osaka, Japan). Cyclohexyl methacrylate (CHMA) and *p*-acetoxystyrene (PACS) were supplied by Tokyo Chemical Industry (Tokyo, Japan) and Tosoh Finechem (Yamaguchi, Japan), respectively. 1-Methoxy-2-propanol was received from Sigma-Aldrich (Burlington, Massachusetts, United States).

## Polymer synthesis and characterization

Synthesis conditions:

The selection was exhaustive for each condition. We selected points around the central condition where each monomer does not have extremely high/low conversion rates so that the transition of monomer conversion can be checked, and so that the number of points does not increase excessively. In particular, when the conversion rate for each monomer is extremely high, clogging of the tubes occurs.

- Monomer A/B composition ratio: A/B = 70/30, 50/50, and 30/70.
- SM: 2, 4, and 10.
- Amount of initiator: 1 and 5 mol%.
- Reaction temperature: 60 and 80°C.
- Reaction time: 5, 10, 20, and 30 min.

HPLC conditions:

High-performance liquid chromatography (HPLC, Shimadzu, (DGU-20A3, LC-20AB, SIL-20A, SPD-M20A, CTO-20A)), using a separation column (GL Science, ODS-3 5  $\mu$ m 4.6  $\times$  250 mm), was employed for the analyses of the copolymerization composition.

- Flow rate: 1.0 mL/min
- Elution solvent volume ratio: Acetonitrile/Ultrapure water = 55/45
- Sample concentration: 0.2 mass%
- Sample injection volume: 1  $\mu$ L
- Column temperature: 40°C
- Detector: UV-visible spectrophotometer at 210 nm

Each monomer concentration is calculated from a calibration curve.

**Table S2-1.** List of synthesized copolymers.

| Sample No. | M1   | M1<br>composition ratio<br>[mol%] | M2<br>composition ratio<br>[mol%] | Initiator<br>composition ratio<br>[mol%] | SM | Flow<br>velocity<br>[ml./min.] | Temperature<br>[°C] | Reaction<br>time<br>[min] | M1<br>conversion<br>[%] | M2<br>conversion<br>[%] | M1<br>ICR<br>[mol%] |
|------------|------|-----------------------------------|-----------------------------------|------------------------------------------|----|--------------------------------|---------------------|---------------------------|-------------------------|-------------------------|---------------------|
| F-52-1     | CHMA | 50                                | 50                                | 5                                        | 4  | 6.28                           | 60                  | 5                         | 18.52                   | 18                      | 50.71               |
| F-52-2     | CHMA | 50                                | 50                                | 5                                        | 4  | 3.14                           | 60                  | 10                        | 27.35                   | 25.29                   | 51.96               |
| F-52-3     | CHMA | 50                                | 50                                | 5                                        | 4  | 1.57                           | 60                  | 20                        | 42.3                    | 36.79                   | 53.48               |
| F-52-4     | CHMA | 50                                | 50                                | 5                                        | 4  | 1.05                           | 60                  | 29.9                      | 52.62                   | 46.56                   | 53.06               |
| F-53-1     | CHMA | 30                                | 70                                | 5                                        | 4  | 6.28                           | 60                  | 5                         | 16.54                   | 15.07                   | 31.98               |
| F-53-2     | CHMA | 30                                | 70                                | 5                                        | 4  | 3.14                           | 60                  | 10                        | 25.23                   | 22.74                   | 32.23               |
| F-53-3     | CHMA | 30                                | 70                                | 5                                        | 4  | 1.57                           | 60                  | 20                        | 39.18                   | 34.93                   | 32.46               |
| F-53-4     | CHMA | 30                                | 70                                | 5                                        | 4  | 1.05                           | 60                  | 29.9                      | 50.65                   | 44.3                    | 32.89               |
| F-54-1     | CHMA | 70                                | 30                                | 5                                        | 4  | 6.28                           | 60                  | 5                         | 19.22                   | 15.91                   | 73.81               |
| F-54-2     | CHMA | 70                                | 30                                | 5                                        | 4  | 3.14                           | 60                  | 10                        | 27.58                   | 22.78                   | 73.86               |
| F-54-3     | CHMA | 70                                | 30                                | 5                                        | 4  | 1.57                           | 60                  | 20                        | 42.21                   | 34.81                   | 73.89               |
| F-54-4     | CHMA | 70                                | 30                                | 5                                        | 4  | 1.05                           | 60                  | 29.9                      | 53.17                   | 44.39                   | 73.65               |
| F-55-1     | CHMA | 50                                | 50                                | 5                                        | 4  | 6.28                           | 80                  | 5                         | 36.94                   | 32.52                   | 53.19               |
| F-55-2     | CHMA | 50                                | 50                                | 5                                        | 4  | 3.14                           | 80                  | 10                        | 54.41                   | 47.24                   | 53.53               |
| F-55-3     | CHMA | 50                                | 50                                | 5                                        | 4  | 1.57                           | 80                  | 20                        | 66.91                   | 57.85                   | 53.63               |
| F-55-4     | CHMA | 50                                | 50                                | 5                                        | 4  | 1.05                           | 80                  | 29.9                      | 73.36                   | 64.46                   | 53.23               |
| F-56-1     | CHMA | 50                                | 50                                | 1                                        | 4  | 6.28                           | 60                  | 5                         | 11.9                    | 11.46                   | 50.94               |
| F-56-2     | CHMA | 50                                | 50                                | 1                                        | 4  | 3.14                           | 60                  | 10                        | 16.47                   | 15.07                   | 52.23               |
| F-56-3     | CHMA | 50                                | 50                                | 1                                        | 4  | 1.57                           | 60                  | 20                        | 25.86                   | 22.56                   | 53.42               |
| F-56-4     | CHMA | 50                                | 50                                | 1                                        | 4  | 1.05                           | 60                  | 29.9                      | 34.53                   | 29.8                    | 53.68               |
| F-57-1     | CHMA | 50                                | 50                                | 5                                        | 10 | 6.28                           | 60                  | 5                         | 12.2                    | 10.47                   | 53.81               |
| F-57-2     | CHMA | 50                                | 50                                | 5                                        | 10 | 3.14                           | 60                  | 10                        | 14.65                   | 10.97                   | 57.17               |
| F-57-3     | CHMA | 50                                | 50                                | 5                                        | 10 | 1.57                           | 60                  | 20                        | 27.66                   | 22.01                   | 55.69               |
| F-57-4     | CHMA | 50                                | 50                                | 5                                        | 10 | 1.05                           | 60                  | 29.9                      | 35.84                   | 29.08                   | 55.21               |
| F-58-1     | CHMA | 50                                | 50                                | 5                                        | 2  | 6.28                           | 60                  | 5                         | 22.65                   | 20.07                   | 53.02               |
| F-58-2     | CHMA | 50                                | 50                                | 5                                        | 2  | 3.14                           | 60                  | 10                        | 33.58                   | 29.57                   | 53.18               |
| F-58-3     | CHMA | 50                                | 50                                | 5                                        | 2  | 1.57                           | 60                  | 20                        | 53.31                   | 45.36                   | 54.03               |
| F-58-4     | CHMA | 50                                | 50                                | 5                                        | 2  | 1.05                           | 60                  | 29.9                      | 63.28                   | 56.24                   | 52.94               |
| F-1r1_1    | GMA  | 50                                | 50                                | 5                                        | 4  | 6.28                           | 60                  | 5                         | 25.46                   | 17.71                   | 58.97               |
| F-1r1_2    | GMA  | 50                                | 50                                | 5                                        | 4  | 3.14                           | 60                  | 10                        | 32.65                   | 24.76                   | 56.86               |
| F-1r1_3    | GMA  | 50                                | 50                                | 5                                        | 4  | 1.57                           | 60                  | 20                        | 45.11                   | 35.68                   | 55.83               |
| F-1r1_4    | GMA  | 50                                | 50                                | 5                                        | 4  | 1.05                           | 60                  | 29.9                      | 55.29                   | 45.77                   | 54.7                |
| F-1r2_1    | GMA  | 50                                | 50                                | 5                                        | 4  | 6.28                           | 60                  | 5                         | 24.86                   | 16.94                   | 59.46               |
| F-1r2_2    | GMA  | 50                                | 50                                | 5                                        | 4  | 3.14                           | 60                  | 10                        | 32.49                   | 24.1                    | 57.41               |
| F-1r2_3    | GMA  | 50                                | 50                                | 5                                        | 4  | 1.57                           | 60                  | 20                        | 44.04                   | 34.76                   | 55.88               |
| F-1r2_4    | GMA  | 50                                | 50                                | 5                                        | 4  | 1.05                           | 60                  | 29.9                      | 56.29                   | 46.97                   | 54.51               |
| F-1r3_1    | GMA  | 50                                | 50                                | 5                                        | 4  | 6.28                           | 60                  | 5                         | 25.31                   | 17.96                   | 58.49               |
| F-1r3_2    | GMA  | 50                                | 50                                | 5                                        | 4  | 3.14                           | 60                  | 10                        | 32.48                   | 24.71                   | 56.78               |
| F-1r3_3    | GMA  | 50                                | 50                                | 5                                        | 4  | 1.57                           | 60                  | 20                        | 44.41                   | 36.04                   | 55.2                |
| F-1r3_4    | GMA  | 50                                | 50                                | 5                                        | 4  | 1.05                           | 60                  | 29.9                      | 53.75                   | 44.83                   | 54.52               |
| F-1r4_1    | GMA  | 50                                | 50                                | 5                                        | 4  | 6.28                           | 60                  | 5                         | 24.11                   | 16.78                   | 58.95               |
| F-1r4_2    | GMA  | 50                                | 50                                | 5                                        | 4  | 3.14                           | 60                  | 10                        | 31.72                   | 23.64                   | 57.28               |
| F-1r4_3    | GMA  | 50                                | 50                                | 5                                        | 4  | 1.57                           | 60                  | 20                        | 43.88                   | 30.89                   | 58.68               |
| F-1r4_4    | GMA  | 50                                | 50                                | 5                                        | 4  | 1.05                           | 60                  | 29.9                      | 53.59                   | 44.6                    | 54.57               |
| F-1r5_1    | GMA  | 50                                | 50                                | 5                                        | 4  | 6.28                           | 60                  | 5                         | 24.38                   | 16.06                   | 60.28               |
| F-1r5_2    | GMA  | 50                                | 50                                | 5                                        | 4  | 3.14                           | 60                  | 10                        | 32.38                   | 23.17                   | 58.28               |
| F-1r5_3    | GMA  | 50                                | 50                                | 5                                        | 4  | 1.57                           | 60                  | 20                        | 44.67                   | 35.01                   | 56.05               |
| F-1r5_4    | GMA  | 50                                | 50                                | 5                                        | 4  | 1.05                           | 60                  | 29.9                      | 54.97                   | 44.72                   | 55.14               |
| F-2_1      | GMA  | 50                                | 50                                | 5                                        | 4  | 6.28                           | 80                  | 5                         | 40.41                   | 31.6                    | 56.11               |
| F-2_2      | GMA  | 50                                | 50                                | 5                                        | 4  | 3.14                           | 80                  | 10                        | 54.63                   | 45.22                   | 54.7                |
| F-2_3      | GMA  | 50                                | 50                                | 5                                        | 4  | 1.57                           | 80                  | 20                        | 71.87                   | 63.33                   | 53.15               |
| F-2_4      | GMA  | 50                                | 50                                | 5                                        | 4  | 1.05                           | 80                  | 29.9                      | 77.15                   | 69.18                   | 52.71               |
| F-4_1      | GMA  | 50                                | 50                                | 5                                        | 10 | 6.28                           | 60                  | 5                         | 17.81                   | 10.16                   | 63.67               |
| F-4_2      | GMA  | 50                                | 50                                | 5                                        | 10 | 3.14                           | 60                  | 10                        | 22.73                   | 14.72                   | 60.69               |
| F-4_3      | GMA  | 50                                | 50                                | 5                                        | 10 | 1.57                           | 60                  | 20                        | 30.44                   | 21.48                   | 58.62               |
| F-4_4      | GMA  | 50                                | 50                                | 5                                        | 10 | 1.05                           | 60                  | 29.9                      | 38.44                   | 29.12                   | 56.89               |
| F-5_1      | GMA  | 50                                | 50                                | 1                                        | 4  | 6.28                           | 60                  | 5                         | 18                      | 10.16                   | 63.91               |
| F-5_2      | GMA  | 50                                | 50                                | 1                                        | 4  | 3.14                           | 60                  | 10                        | 21.52                   | 12.86                   | 62.59               |
| F-5_3      | GMA  | 50                                | 50                                | 1                                        | 4  | 1.57                           | 60                  | 20                        | 27.88                   | 18.18                   | 60.53               |
| F-5_4      | GMA  | 50                                | 50                                | 1                                        | 4  | 1.05                           | 60                  | 29.9                      | 34.54                   | 24.25                   | 58.75               |
| F-6_1      | GMA  | 50                                | 50                                | 5                                        | 10 | 6.28                           | 80                  | 5                         | 28.29                   | 19.66                   | 59                  |
| F-6_2      | GMA  | 50                                | 50                                | 5                                        | 10 | 3.14                           | 80                  | 10                        | 39.82                   | 29.88                   | 57.12               |

**Table S2-2.** List of synthesized copolymers.

| Sample No. | M1   | M1 composition ratio [mol%] | M2 composition ratio [mol%] | Initiator composition ratio [mol%] | SM | Flow velocity [mL/min.] | Temperature [°C] | Reaction time [min] | M1 conversion [%] | M2 conversion [%] | M1 ICR [mol%] |
|------------|------|-----------------------------|-----------------------------|------------------------------------|----|-------------------------|------------------|---------------------|-------------------|-------------------|---------------|
| F-6_3      | GMA  | 50                          | 50                          | 5                                  | 10 | 1.57                    | 80               | 20                  | 52.96             | 42.93             | 55.22         |
| F-6_4      | GMA  | 50                          | 50                          | 5                                  | 10 | 1.05                    | 80               | 29.9                | 59.82             | 49.92             | 54.5          |
| F-7_1      | GMA  | 50                          | 50                          | 1                                  | 4  | 6.28                    | 80               | 5                   | 30.56             | 21.47             | 58.74         |
| F-7_2      | GMA  | 50                          | 50                          | 1                                  | 4  | 3.14                    | 80               | 10                  | 39.74             | 29.32             | 57.55         |
| F-7_3      | GMA  | 50                          | 50                          | 1                                  | 4  | 1.57                    | 80               | 20                  | 54.05             | 43.44             | 55.45         |
| F-7_4      | GMA  | 50                          | 50                          | 1                                  | 4  | 1.05                    | 80               | 29.9                | 63.75             | 53.84             | 54.21         |
| F-8_1      | GMA  | 70                          | 30                          | 5                                  | 4  | 6.28                    | 60               | 5                   | 23.5              | 14.21             | 79.42         |
| F-8_2      | GMA  | 70                          | 30                          | 5                                  | 4  | 3.14                    | 60               | 10                  | 30.74             | 20.6              | 77.69         |
| F-8_3      | GMA  | 70                          | 30                          | 5                                  | 4  | 1.57                    | 60               | 20                  | 43.45             | 31.74             | 76.16         |
| F-8_4      | GMA  | 70                          | 30                          | 5                                  | 4  | 1.05                    | 60               | 29.9                | 54.7              | 42.93             | 74.83         |
| F-9_1      | GMA  | 30                          | 70                          | 5                                  | 4  | 6.28                    | 60               | 5                   | 22.78             | 14.64             | 40.01         |
| F-9_2      | GMA  | 30                          | 70                          | 5                                  | 4  | 3.14                    | 60               | 10                  | 29.06             | 21.34             | 36.86         |
| F-9_3      | GMA  | 30                          | 70                          | 5                                  | 4  | 1.57                    | 60               | 20                  | 42.93             | 35.15             | 34.36         |
| F-9_4      | GMA  | 30                          | 70                          | 5                                  | 4  | 1.05                    | 60               | 29.9                | 51.43             | 43.74             | 33.51         |
| F-17-1     | GMA  | 30                          | 70                          | 1                                  | 4  | 6.28                    | 80               | 5                   | 29.64             | 22.05             | 36.56         |
| F-17-2     | GMA  | 30                          | 70                          | 1                                  | 4  | 3.14                    | 80               | 10                  | 42.01             | 34.28             | 34.44         |
| F-17-3     | GMA  | 30                          | 70                          | 1                                  | 4  | 1.57                    | 80               | 20                  | 57.71             | 50.32             | 32.96         |
| F-17-4     | GMA  | 30                          | 70                          | 1                                  | 4  | 1.05                    | 80               | 29.9                | 67.08             | 59.6              | 32.55         |
| F-18-1     | GMA  | 30                          | 70                          | 1                                  | 4  | 6.28                    | 60               | 5                   | 16.91             | 10.21             | 41.52         |
| F-18-2     | GMA  | 30                          | 70                          | 1                                  | 4  | 3.14                    | 60               | 10                  | 20.19             | 12.18             | 41.54         |
| F-18-3     | GMA  | 30                          | 70                          | 1                                  | 4  | 1.57                    | 60               | 20                  | 27.69             | 19.86             | 37.4          |
| F-18-4     | GMA  | 30                          | 70                          | 1                                  | 4  | 1.05                    | 60               | 29.9                | 34.8              | 27.97             | 34.77         |
| F-21-1     | GMA  | 30                          | 70                          | 5                                  | 4  | 6.28                    | 80               | 5                   | 39.7              | 32.05             | 34.68         |
| F-21-2     | GMA  | 30                          | 70                          | 5                                  | 4  | 3.14                    | 80               | 10                  | 54.87             | 47.45             | 33.14         |
| F-21-3     | GMA  | 30                          | 70                          | 5                                  | 4  | 1.57                    | 80               | 20                  | 72.3              | 64.92             | 32.31         |
| F-21-4     | GMA  | 30                          | 70                          | 5                                  | 4  | 1.05                    | 80               | 29.9                | 79.58             | 73.07             | 31.82         |
| F-33-1     | GMA  | 60                          | 40                          | 5                                  | 4  | 6.28                    | 60               | 5                   | 24.51             | 16.64             | 68.84         |
| F-33-2     | GMA  | 60                          | 40                          | 5                                  | 4  | 3.14                    | 60               | 10                  | 31.74             | 23.26             | 67.18         |
| F-33-3     | GMA  | 60                          | 40                          | 5                                  | 4  | 1.57                    | 60               | 20                  | 43.96             | 33.59             | 66.25         |
| F-33-4     | GMA  | 60                          | 40                          | 5                                  | 4  | 1.05                    | 60               | 29.9                | 53.87             | 43.75             | 64.87         |
| F-35-1     | GMA  | 20                          | 80                          | 5                                  | 4  | 6.28                    | 60               | 5                   | 20.22             | 13.37             | 27.43         |
| F-35-2     | GMA  | 20                          | 80                          | 5                                  | 4  | 3.14                    | 60               | 10                  | 27.32             | 20.06             | 25.4          |
| F-35-3     | GMA  | 20                          | 80                          | 5                                  | 4  | 1.57                    | 60               | 20                  | 40.57             | 34.08             | 22.93         |
| F-35-4     | GMA  | 20                          | 80                          | 5                                  | 4  | 1.05                    | 60               | 29.9                | 50.61             | 43.53             | 22.51         |
| F-37-1     | GMA  | 40                          | 60                          | 1                                  | 4  | 6.28                    | 60               | 5                   | 16.17             | 9.63              | 52.81         |
| F-37-2     | GMA  | 40                          | 60                          | 1                                  | 4  | 3.14                    | 60               | 10                  | 20.28             | 12.43             | 52.08         |
| F-37-3     | GMA  | 40                          | 60                          | 1                                  | 4  | 1.57                    | 60               | 20                  | 27.45             | 20.76             | 46.85         |
| F-37-4     | GMA  | 40                          | 60                          | 1                                  | 4  | 1.05                    | 60               | 29.9                | 35.47             | 28.67             | 45.19         |
| F-38-1     | PACS | 50                          | 50                          | 5                                  | 4  | 6.28                    | 60               | 5                   | 8.77              | 11.83             | 42.56         |
| F-38-2     | PACS | 50                          | 50                          | 5                                  | 4  | 3.14                    | 60               | 10                  | 10.67             | 12.47             | 46.11         |
| F-38-3     | PACS | 50                          | 50                          | 5                                  | 4  | 1.57                    | 60               | 20                  | 16                | 16.87             | 48.68         |
| F-38-4     | PACS | 50                          | 50                          | 5                                  | 4  | 1.05                    | 60               | 29.9                | 20.46             | 20.44             | 50.02         |
| F-39-1     | PACS | 30                          | 70                          | 5                                  | 4  | 6.28                    | 60               | 5                   | 13.24             | 11.47             | 33.1          |
| F-39-2     | PACS | 30                          | 70                          | 5                                  | 4  | 3.14                    | 60               | 10                  | 16.14             | 13.31             | 34.2          |
| F-39-3     | PACS | 30                          | 70                          | 5                                  | 4  | 1.57                    | 60               | 20                  | 23.28             | 18.69             | 34.81         |
| F-39-4     | PACS | 30                          | 70                          | 5                                  | 4  | 1.05                    | 60               | 29.9                | 31.98             | 26.12             | 34.42         |
| F-40-1     | PACS | 70                          | 30                          | 5                                  | 4  | 6.28                    | 60               | 5                   | 9.39              | 11.26             | 66.05         |
| F-40-2     | PACS | 70                          | 30                          | 5                                  | 4  | 3.14                    | 60               | 10                  | 11.2              | 12.84             | 67.06         |
| F-40-3     | PACS | 70                          | 30                          | 5                                  | 4  | 1.57                    | 60               | 20                  | 14.83             | 16.58             | 67.6          |
| F-40-4     | PACS | 70                          | 30                          | 5                                  | 4  | 1.05                    | 60               | 29.9                | 19.02             | 21.93             | 66.93         |
| F-41-1     | PACS | 50                          | 50                          | 5                                  | 4  | 6.28                    | 80               | 5                   | 20.77             | 21.11             | 49.59         |
| F-41-2     | PACS | 50                          | 50                          | 5                                  | 4  | 3.14                    | 80               | 10                  | 29.43             | 28.72             | 50.62         |
| F-41-3     | PACS | 50                          | 50                          | 5                                  | 4  | 1.57                    | 80               | 20                  | 41.25             | 37.69             | 52.25         |
| F-42-1     | PACS | 50                          | 50                          | 1                                  | 4  | 6.28                    | 60               | 5                   | 5.04              | 8.58              | 37.03         |
| F-42-2     | PACS | 50                          | 50                          | 1                                  | 4  | 3.14                    | 60               | 10                  | 7.06              | 9.28              | 43.19         |
| F-42-3     | PACS | 50                          | 50                          | 1                                  | 4  | 1.57                    | 60               | 20                  | 9.94              | 11.76             | 45.81         |
| F-42-4     | PACS | 50                          | 50                          | 1                                  | 4  | 1.05                    | 60               | 29.9                | 13.11             | 14.64             | 47.24         |
| F-43-2     | PACS | 50                          | 50                          | 5                                  | 10 | 3.14                    | 60               | 10                  | 11.33             | 9.61              | 54.12         |
| F-43-3     | PACS | 50                          | 50                          | 5                                  | 10 | 1.57                    | 60               | 20                  | 14.3              | 12.28             | 53.8          |
| F-43-4     | PACS | 50                          | 50                          | 5                                  | 10 | 1.05                    | 60               | 29.9                | 17.01             | 14.28             | 54.36         |
| F-44-1     | PACS | 50                          | 50                          | 5                                  | 2  | 6.28                    | 60               | 5                   | 11.09             | 12.93             | 46.17         |
| F-44-2     | PACS | 50                          | 50                          | 5                                  | 2  | 3.14                    | 60               | 10                  | 14.94             | 17                | 46.78         |

**Table S2-3.** List of synthesized copolymers.

| Sample No. | M1   | M1<br>composition ratio<br>[mol%] | M2<br>composition ratio<br>[mol%] | Initiator<br>composition ratio<br>[mol%] | SM | Flow<br>velocity<br>[mL/min.] | Temperature<br>[°C] | Reaction<br>time<br>[min] | M1<br>conversion<br>[%] | M2<br>conversion<br>[%] | M1<br>ICR<br>[mol%] |
|------------|------|-----------------------------------|-----------------------------------|------------------------------------------|----|-------------------------------|---------------------|---------------------------|-------------------------|-------------------------|---------------------|
| F-44-3     | PACS | 50                                | 50                                | 5                                        | 2  | 1.57                          | 60                  | 20                        | 21.68                   | 22.59                   | 48.98               |
| F-44-4     | PACS | 50                                | 50                                | 5                                        | 2  | 1.05                          | 60                  | 29.9                      | 27.65                   | 27.82                   | 49.85               |
| F-75-1     | PACS | 30                                | 70                                | 5                                        | 4  | 6.28                          | 80                  | 5                         | 26.79                   | 20.9                    | 35.46               |
| F-75-2     | PACS | 30                                | 70                                | 5                                        | 4  | 3.14                          | 80                  | 10                        | 39.47                   | 29.74                   | 36.26               |
| F-75-3     | PACS | 30                                | 70                                | 5                                        | 4  | 1.57                          | 80                  | 20                        | 57.04                   | 42.37                   | 36.58               |
| F-3_1      | ST   | 50                                | 50                                | 5                                        | 4  | 6.28                          | 60                  | 5                         | 6.26                    | 9.5                     | 39.73               |
| F-3_2      | ST   | 50                                | 50                                | 5                                        | 4  | 3.14                          | 60                  | 10                        | 8.25                    | 11.35                   | 42.1                |
| F-3_3      | ST   | 50                                | 50                                | 5                                        | 4  | 1.57                          | 60                  | 20                        | 13.39                   | 15.6                    | 46.2                |
| F-3_4      | ST   | 50                                | 50                                | 5                                        | 4  | 1.05                          | 60                  | 29.9                      | 16.66                   | 18.39                   | 47.54               |
| F-10_1     | ST   | 70                                | 30                                | 5                                        | 4  | 6.28                          | 60                  | 5                         | 4.19                    | 9.64                    | 50.36               |
| F-10_2     | ST   | 70                                | 30                                | 5                                        | 4  | 3.14                          | 60                  | 10                        | 6.36                    | 11.6                    | 56.11               |
| F-10_3     | ST   | 70                                | 30                                | 5                                        | 4  | 1.57                          | 60                  | 20                        | 9.2                     | 14.63                   | 59.47               |
| F-10_4     | ST   | 70                                | 30                                | 5                                        | 4  | 1.05                          | 60                  | 29.9                      | 12.51                   | 18.19                   | 61.6                |
| F-11_1     | ST   | 50                                | 50                                | 5                                        | 4  | 6.28                          | 80                  | 5                         | 15.17                   | 17.35                   | 46.65               |
| F-11_2     | ST   | 50                                | 50                                | 5                                        | 4  | 3.14                          | 80                  | 10                        | 22.98                   | 23.32                   | 49.62               |
| F-11_3     | ST   | 50                                | 50                                | 5                                        | 4  | 1.57                          | 80                  | 20                        | 32.25                   | 31.06                   | 50.93               |
| F-11_4     | ST   | 50                                | 50                                | 5                                        | 4  | 1.05                          | 80                  | 29.9                      | 37.99                   | 35.86                   | 51.43               |
| F-12_1     | ST   | 70                                | 30                                | 5                                        | 4  | 6.28                          | 80                  | 5                         | 11.61                   | 16.21                   | 62.56               |
| F-12_2     | ST   | 70                                | 30                                | 5                                        | 4  | 3.14                          | 80                  | 10                        | 18.93                   | 22.97                   | 65.79               |
| F-12_3     | ST   | 70                                | 30                                | 5                                        | 4  | 1.57                          | 80                  | 20                        | 24.58                   | 28.78                   | 66.59               |
| F-12_4     | ST   | 70                                | 30                                | 5                                        | 4  | 1.05                          | 80                  | 29.9                      | 27.41                   | 31.27                   | 67.16               |
| F-13_1     | ST   | 30                                | 70                                | 5                                        | 4  | 6.28                          | 80                  | 5                         | 22.29                   | 17.85                   | 34.86               |
| F-13_2     | ST   | 30                                | 70                                | 5                                        | 4  | 3.14                          | 80                  | 10                        | 33.41                   | 25.7                    | 35.78               |
| F-13_3     | ST   | 30                                | 70                                | 5                                        | 4  | 1.57                          | 80                  | 20                        | 45.46                   | 34.51                   | 36.08               |
| F-13_4     | ST   | 30                                | 70                                | 5                                        | 4  | 1.05                          | 80                  | 29.9                      | 51.56                   | 39.21                   | 36.04               |
| F-14-1     | ST   | 50                                | 50                                | 5                                        | 10 | 6.28                          | 80                  | 5                         | 15.16                   | 13.75                   | 52.46               |
| F-14-2     | ST   | 50                                | 50                                | 5                                        | 10 | 3.14                          | 80                  | 10                        | 19.23                   | 17.32                   | 52.63               |
| F-14-3     | ST   | 50                                | 50                                | 5                                        | 10 | 1.57                          | 80                  | 20                        | 28.13                   | 24.04                   | 53.94               |
| F-14-4     | ST   | 50                                | 50                                | 5                                        | 10 | 1.05                          | 80                  | 29.9                      | 33.98                   | 29.08                   | 53.89               |
| F-15-1     | ST   | 50                                | 50                                | 1                                        | 4  | 6.28                          | 80                  | 5                         | 9.38                    | 12.14                   | 43.58               |
| F-15-2     | ST   | 50                                | 50                                | 1                                        | 4  | 3.14                          | 80                  | 10                        | 14.62                   | 16.97                   | 46.27               |
| F-15-3     | ST   | 50                                | 50                                | 1                                        | 4  | 1.57                          | 80                  | 20                        | 20.42                   | 22.05                   | 48.07               |
| F-15-4     | ST   | 50                                | 50                                | 1                                        | 4  | 1.05                          | 80                  | 29.9                      | 26.82                   | 27.91                   | 49                  |
| F-22-1     | ST   | 50                                | 50                                | 5                                        | 10 | 6.28                          | 60                  | 5                         | 7.78                    | 8.02                    | 49.27               |
| F-22-2     | ST   | 50                                | 50                                | 5                                        | 10 | 3.14                          | 60                  | 10                        | 8.73                    | 9.04                    | 49.15               |
| F-22-3     | ST   | 50                                | 50                                | 5                                        | 10 | 1.57                          | 60                  | 20                        | 10.63                   | 10.58                   | 50.14               |
| F-22-4     | ST   | 50                                | 50                                | 5                                        | 10 | 1.05                          | 60                  | 29.9                      | 13.28                   | 12.54                   | 51.44               |
| F-24-1     | ST   | 30                                | 70                                | 5                                        | 4  | 6.28                          | 60                  | 5                         | 11.38                   | 11.15                   | 30.43               |
| F-24-2     | ST   | 30                                | 70                                | 5                                        | 4  | 3.14                          | 60                  | 10                        | 13.8                    | 12.76                   | 31.67               |
| F-24-3     | ST   | 30                                | 70                                | 5                                        | 4  | 1.57                          | 60                  | 20                        | 19.19                   | 16.46                   | 33.33               |
| F-24-4     | ST   | 30                                | 70                                | 5                                        | 4  | 1.05                          | 60                  | 29.9                      | 24.31                   | 20.42                   | 33.78               |
| F-25-1     | ST   | 50                                | 50                                | 5                                        | 2  | 6.28                          | 60                  | 5                         | 10.24                   | 10.51                   | 49.35               |
| F-25-2     | ST   | 50                                | 50                                | 5                                        | 2  | 3.14                          | 60                  | 10                        | 11.26                   | 11.48                   | 49.52               |
| F-25-3     | ST   | 50                                | 50                                | 5                                        | 2  | 1.57                          | 60                  | 20                        | 16.22                   | 16.58                   | 49.45               |
| F-25-4     | ST   | 50                                | 50                                | 5                                        | 2  | 1.05                          | 60                  | 29.9                      | 19.97                   | 20.66                   | 49.14               |
| F-28r1-1   | ST   | 80                                | 20                                | 5                                        | 4  | 6.28                          | 60                  | 5                         | 5                       | 8.24                    | 70.81               |
| F-28r1-2   | ST   | 80                                | 20                                | 5                                        | 4  | 3.14                          | 60                  | 10                        | 7.61                    | 11.54                   | 72.51               |
| F-28r1-3   | ST   | 80                                | 20                                | 5                                        | 4  | 1.57                          | 60                  | 20                        | 10.19                   | 14.28                   | 74.06               |
| F-28r1-4   | ST   | 80                                | 20                                | 5                                        | 4  | 1.05                          | 60                  | 29.9                      | 12.52                   | 17.51                   | 74.1                |
| F-29r1-1   | ST   | 60                                | 40                                | 5                                        | 4  | 6.28                          | 60                  | 5                         | 7.19                    | 11.33                   | 48.76               |
| F-29r1-2   | ST   | 60                                | 40                                | 5                                        | 4  | 3.14                          | 60                  | 10                        | 8.62                    | 12.91                   | 50.03               |
| F-29r1-3   | ST   | 60                                | 40                                | 5                                        | 4  | 1.57                          | 60                  | 20                        | 10.86                   | 14.32                   | 53.24               |
| F-29r1-4   | ST   | 60                                | 40                                | 5                                        | 4  | 1.05                          | 60                  | 29.9                      | 14.68                   | 18.64                   | 54.16               |
| F-30r1-1   | ST   | 40                                | 60                                | 5                                        | 4  | 6.28                          | 60                  | 5                         | 10.03                   | 12.09                   | 35.61               |
| F-30r1-2   | ST   | 40                                | 60                                | 5                                        | 4  | 3.14                          | 60                  | 10                        | 10.91                   | 12.49                   | 36.79               |
| F-30r1-3   | ST   | 40                                | 60                                | 5                                        | 4  | 1.57                          | 60                  | 20                        | 16.11                   | 16.3                    | 39.72               |
| F-30r1-4   | ST   | 40                                | 60                                | 5                                        | 4  | 1.05                          | 60                  | 29.9                      | 20.29                   | 20.03                   | 40.31               |
| F-31r1-1   | ST   | 20                                | 80                                | 5                                        | 4  | 6.28                          | 60                  | 5                         | 12.4                    | 9.43                    | 24.74               |
| F-31r1-2   | ST   | 20                                | 80                                | 5                                        | 4  | 3.14                          | 60                  | 10                        | 15.87                   | 11.39                   | 25.83               |
| F-31r1-3   | ST   | 20                                | 80                                | 5                                        | 4  | 1.57                          | 60                  | 20                        | 23.8                    | 16.92                   | 26.01               |
| F-31r1-4   | ST   | 20                                | 80                                | 5                                        | 4  | 1.05                          | 60                  | 29.9                      | 29.62                   | 20.3                    | 26.73               |
| F-36-1     | ST   | 60                                | 40                                | 1                                        | 4  | 6.28                          | 60                  | 5                         | 14.02                   | 19.31                   | 52.13               |

**Table S2-4.** List of synthesized copolymers.

| Sample No. | M1    | M1<br>composition ratio<br>[mol%] | M2<br>composition ratio<br>[mol%] | Initiator<br>composition ratio<br>[mol%] | SM | Flow<br>velocity<br>[mL/min.] | Temperature<br>[°C] | Reaction<br>time<br>[min] | M1<br>conversion<br>[%] | M2<br>conversion<br>[%] | M1<br>ICR<br>[mol%] |
|------------|-------|-----------------------------------|-----------------------------------|------------------------------------------|----|-------------------------------|---------------------|---------------------------|-------------------------|-------------------------|---------------------|
| F-36-2     | ST    | 60                                | 40                                | 1                                        | 4  | 3.14                          | 60                  | 10                        | 14.24                   | 19.53                   | 52.24               |
| F-36-3     | ST    | 60                                | 40                                | 1                                        | 4  | 1.57                          | 60                  | 20                        | 15.56                   | 20.96                   | 52.7                |
| F-36-4     | ST    | 60                                | 40                                | 1                                        | 4  | 1.05                          | 60                  | 29.9                      | 17.27                   | 22.35                   | 53.69               |
| F-45-1     | THFMA | 50                                | 50                                | 5                                        | 4  | 6.28                          | 60                  | 5                         | 16.73                   | 17.47                   | 48.92               |
| F-45-2     | THFMA | 50                                | 50                                | 5                                        | 4  | 3.14                          | 60                  | 10                        | 26.04                   | 25.25                   | 50.77               |
| F-45-3     | THFMA | 50                                | 50                                | 5                                        | 4  | 1.57                          | 60                  | 20                        | 39.15                   | 37.75                   | 50.91               |
| F-45-4     | THFMA | 50                                | 50                                | 5                                        | 4  | 1.05                          | 60                  | 29.9                      | 50.24                   | 46.68                   | 51.84               |
| F-46-1     | THFMA | 30                                | 70                                | 5                                        | 4  | 6.28                          | 60                  | 5                         | 17.28                   | 18.15                   | 28.98               |
| F-46-2     | THFMA | 30                                | 70                                | 5                                        | 4  | 3.14                          | 60                  | 10                        | 24.83                   | 24.47                   | 30.31               |
| F-46-3     | THFMA | 30                                | 70                                | 5                                        | 4  | 1.57                          | 60                  | 20                        | 39.37                   | 37.75                   | 30.88               |
| F-46-4     | THFMA | 30                                | 70                                | 5                                        | 4  | 1.05                          | 60                  | 29.9                      | 48.66                   | 46.3                    | 31.06               |
| F-47-1     | THFMA | 70                                | 30                                | 5                                        | 4  | 6.28                          | 60                  | 5                         | 18.18                   | 16.65                   | 71.81               |
| F-47-2     | THFMA | 70                                | 30                                | 5                                        | 4  | 3.14                          | 60                  | 10                        | 27.29                   | 23.96                   | 72.66               |
| F-47-3     | THFMA | 70                                | 30                                | 5                                        | 4  | 1.57                          | 60                  | 20                        | 41.21                   | 36.67                   | 72.39               |
| F-47-4     | THFMA | 70                                | 30                                | 5                                        | 4  | 1.05                          | 60                  | 29.9                      | 51.81                   | 46.58                   | 72.19               |
| F-48-1     | THFMA | 50                                | 50                                | 5                                        | 4  | 6.28                          | 80                  | 5                         | 37.54                   | 35.29                   | 51.54               |
| F-48-2     | THFMA | 50                                | 50                                | 5                                        | 4  | 3.14                          | 80                  | 10                        | 53.5                    | 50.14                   | 51.62               |
| F-48-3     | THFMA | 50                                | 50                                | 5                                        | 4  | 1.57                          | 80                  | 20                        | 66.22                   | 61.93                   | 51.67               |
| F-48-4     | THFMA | 50                                | 50                                | 5                                        | 4  | 1.05                          | 80                  | 29.9                      | 70.39                   | 65.58                   | 51.77               |
| F-49-1     | THFMA | 50                                | 50                                | 1                                        | 4  | 6.28                          | 60                  | 5                         | 9.45                    | 9.97                    | 48.69               |
| F-49-2     | THFMA | 50                                | 50                                | 1                                        | 4  | 3.14                          | 60                  | 10                        | 14.96                   | 15.69                   | 48.81               |
| F-49-3     | THFMA | 50                                | 50                                | 1                                        | 4  | 1.57                          | 60                  | 20                        | 24.15                   | 22.81                   | 51.42               |
| F-49-4     | THFMA | 50                                | 50                                | 1                                        | 4  | 1.05                          | 60                  | 29.9                      | 31.94                   | 29.82                   | 51.72               |
| F-50-1     | THFMA | 50                                | 50                                | 5                                        | 10 | 6.28                          | 60                  | 5                         | 13.06                   | 11.88                   | 52.37               |
| F-50-2     | THFMA | 50                                | 50                                | 5                                        | 10 | 3.14                          | 60                  | 10                        | 17.15                   | 15.77                   | 52.08               |
| F-50-3     | THFMA | 50                                | 50                                | 5                                        | 10 | 1.57                          | 60                  | 20                        | 25.99                   | 23.41                   | 52.61               |
| F-50-4     | THFMA | 50                                | 50                                | 5                                        | 10 | 1.05                          | 60                  | 29.9                      | 33.8                    | 30.1                    | 52.9                |
| F-51-1     | THFMA | 50                                | 50                                | 5                                        | 2  | 6.28                          | 60                  | 5                         | 21.76                   | 21.36                   | 50.46               |
| F-51-2     | THFMA | 50                                | 50                                | 5                                        | 2  | 3.14                          | 60                  | 10                        | 32.7                    | 31.29                   | 51.1                |
| F-51-3     | THFMA | 50                                | 50                                | 5                                        | 2  | 1.57                          | 60                  | 20                        | 50.14                   | 47.25                   | 51.48               |
| F-51-4     | THFMA | 50                                | 50                                | 5                                        | 2  | 1.05                          | 60                  | 29.9                      | 61.82                   | 58.1                    | 51.55               |
| F-59-1     | THFMA | 30                                | 70                                | 5                                        | 4  | 6.28                          | 80                  | 5                         | 34.93                   | 33.07                   | 31.16               |
| F-59-2     | THFMA | 30                                | 70                                | 5                                        | 4  | 3.14                          | 80                  | 10                        | 51.32                   | 48.3                    | 31.29               |
| F-59-3     | THFMA | 30                                | 70                                | 5                                        | 4  | 1.57                          | 80                  | 20                        | 62.94                   | 58.76                   | 31.46               |
| F-60-1     | THFMA | 70                                | 30                                | 5                                        | 4  | 6.28                          | 80                  | 5                         | 37.89                   | 33.48                   | 72.53               |
| F-60-2     | THFMA | 70                                | 30                                | 5                                        | 4  | 3.14                          | 80                  | 10                        | 54.49                   | 49.48                   | 71.99               |
| F-60-3     | THFMA | 70                                | 30                                | 5                                        | 4  | 1.57                          | 80                  | 20                        | 71.93                   | 66.47                   | 71.63               |
| F-61-1     | THFMA | 30                                | 70                                | 1                                        | 4  | 6.28                          | 60                  | 5                         | 10.23                   | 10.53                   | 29.41               |
| F-61-2     | THFMA | 30                                | 70                                | 1                                        | 4  | 3.14                          | 60                  | 10                        | 14.67                   | 14.8                    | 29.82               |
| F-61-3     | THFMA | 30                                | 70                                | 1                                        | 4  | 1.57                          | 60                  | 20                        | 24.32                   | 23.54                   | 30.69               |
| F-61-4     | THFMA | 30                                | 70                                | 1                                        | 4  | 1.05                          | 60                  | 29.9                      | 31.09                   | 29.54                   | 31.09               |
| F-62-1     | THFMA | 70                                | 30                                | 1                                        | 4  | 6.28                          | 60                  | 5                         | 11.19                   | 10.24                   | 71.84               |
| F-62-2     | THFMA | 70                                | 30                                | 1                                        | 4  | 3.14                          | 60                  | 10                        | 14.49                   | 12.83                   | 72.49               |
| F-62-3     | THFMA | 70                                | 30                                | 1                                        | 4  | 1.57                          | 60                  | 20                        | 25.11                   | 21.96                   | 72.74               |
| F-62-4     | THFMA | 70                                | 30                                | 1                                        | 4  | 1.05                          | 60                  | 29.9                      | 33.18                   | 29.19                   | 72.62               |
| F-63-1     | THFMA | 30                                | 70                                | 5                                        | 10 | 6.28                          | 60                  | 5                         | 11.47                   | 11.64                   | 29.71               |
| F-63-2     | THFMA | 30                                | 70                                | 5                                        | 10 | 3.14                          | 60                  | 10                        | 17.53                   | 16.87                   | 30.8                |
| F-63-3     | THFMA | 30                                | 70                                | 5                                        | 10 | 1.57                          | 60                  | 20                        | 26.34                   | 24.95                   | 31.15               |
| F-63-4     | THFMA | 30                                | 70                                | 5                                        | 10 | 1.05                          | 60                  | 29.9                      | 33.6                    | 31.21                   | 31.57               |
| F-64-1     | THFMA | 70                                | 30                                | 5                                        | 10 | 6.28                          | 60                  | 5                         | 12.99                   | 8.67                    | 77.76               |
| F-64-2     | THFMA | 70                                | 30                                | 5                                        | 10 | 3.14                          | 60                  | 10                        | 18.71                   | 13.89                   | 75.86               |
| F-64-3     | THFMA | 70                                | 30                                | 5                                        | 10 | 1.57                          | 60                  | 20                        | 28.09                   | 22.58                   | 74.38               |
| F-64-4     | THFMA | 70                                | 30                                | 5                                        | 10 | 1.05                          | 60                  | 29.9                      | 36.19                   | 30.65                   | 73.37               |
| F-65-1     | THFMA | 30                                | 70                                | 5                                        | 2  | 6.28                          | 60                  | 5                         | 21.14                   | 17.46                   | 34.16               |
| F-65-2     | THFMA | 30                                | 70                                | 5                                        | 2  | 3.14                          | 60                  | 10                        | 31.56                   | 28.03                   | 32.55               |
| F-65-3     | THFMA | 30                                | 70                                | 5                                        | 2  | 1.57                          | 60                  | 20                        | 48.01                   | 44.76                   | 31.49               |
| F-65-4     | THFMA | 30                                | 70                                | 5                                        | 2  | 1.05                          | 60                  | 29.9                      | 59.84                   | 56.32                   | 31.29               |
| F-66-1     | THFMA | 70                                | 30                                | 5                                        | 2  | 6.28                          | 60                  | 5                         | 21.45                   | 21.22                   | 70.23               |
| F-66-2     | THFMA | 70                                | 30                                | 5                                        | 2  | 3.14                          | 60                  | 10                        | 33.99                   | 31.74                   | 71.42               |
| F-66-3     | THFMA | 70                                | 30                                | 5                                        | 2  | 1.57                          | 60                  | 20                        | 51.49                   | 47.44                   | 71.69               |
| F-66-4     | THFMA | 70                                | 30                                | 5                                        | 2  | 1.05                          | 60                  | 29.9                      | 63.74                   | 59                      | 71.59               |

Representative HPLC traces (St-MMA copolymer)

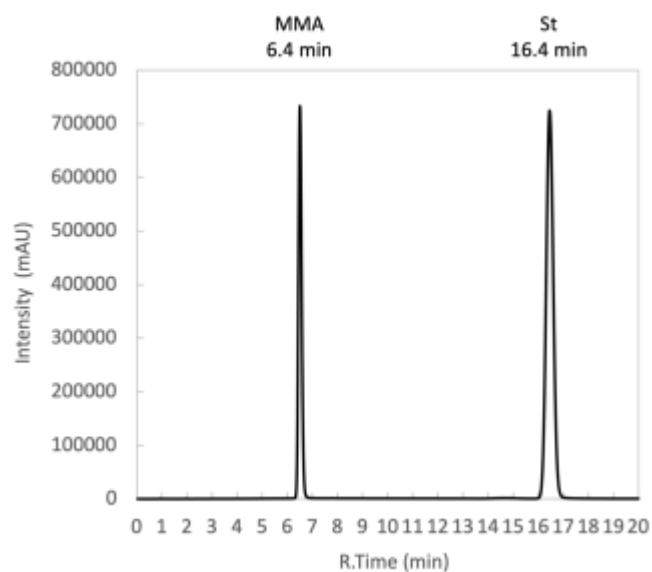

**Figure S2.** HPLC trace for St-MMA copolymer (F-3\_1).

Among the 50 (meth)acrylic and styrene monomers listed in Ref S1, the reactivity of GMA, CHMA, THFMA, ST, and PACS with MMA was considered. Herein, Figure S3 shows that CHMA is more extrapolative.

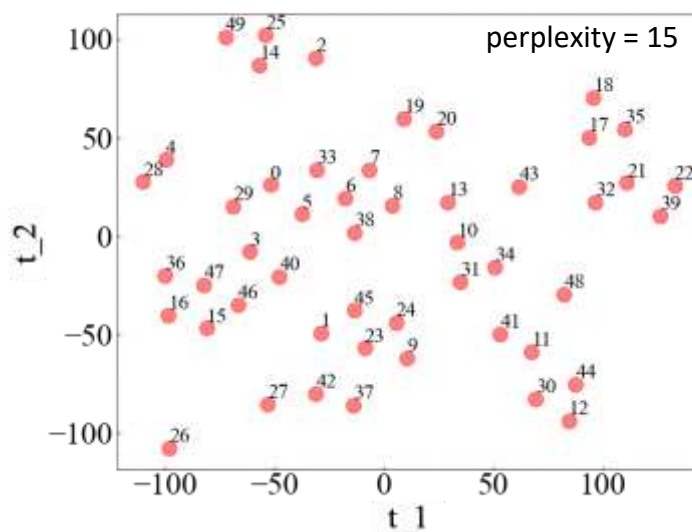

**Figure S3.** Using t-SNE to visualize 50 molecular structural features (RDKit: 208 features).



**Table S3.** List of 50 (meth)acrylic and styrene monomers in Ref S1.

| No. | Monomer name                                       | CAS No.     |
|-----|----------------------------------------------------|-------------|
| 0   | Methyl Methacrylate                                | 80-62-6     |
| 1   | Glycidyl Methacrylate                              | 106-91-2    |
| 2   | Styrene                                            | 100-42-5    |
| 3   | Methyl (Z)-3-methoxyacrylate                       | 5739-81-1   |
| 4   | Methacrylic Acid                                   | 79-41-4     |
| 5   | Ethyl Methacrylate                                 | 97-63-2     |
| 6   | Butyl Methacrylate                                 | 97-88-1     |
| 7   | Isobutyl Methacrylate                              | 97-86-9     |
| 8   | tert-Butyl Methacrylate Monomer                    | 585-07-9    |
| 9   | (3-Ethyloxtan-3-yl)methyl Methacrylate             | 37674-57-0  |
| 10  | 2-Ethylhexyl Methacrylate                          | 688-84-6    |
| 11  | Dodecyl Methacrylate                               | 142-90-5    |
| 12  | Stearyl Methacrylate                               | 32360-05-7  |
| 13  | Cyclohexyl Methacrylate                            | 101-43-9    |
| 14  | Benzyl Methacrylate                                | 2495-37-6   |
| 15  | 2-Hydroxyethyl Methacrylate                        | 868-77-9    |
| 16  | 2-Hydroxypropyl methacrylate                       | 923-26-2    |
| 17  | 3-Hydroxy-1-methacryloyloxyadamantane              | 115372-36-6 |
| 18  | 3,5-Dihydroxy-1-adamantyl methacrylate             | 115522-15-1 |
| 19  | 2-(Dimethylamino)ethyl Methacrylate                | 2867-47-2   |
| 20  | 2-(Diethylamino)ethyl Methacrylate                 | 105-16-8    |
| 21  | Dicyclopentanyl Methacrylate                       | 34759-34-7  |
| 22  | Dicyclopentenylmethoxyethyl methacrylate           | 68586-19-6  |
| 23  | Tetrahydrofurfuryl Methacrylate                    | 2455-24-5   |
| 24  | 2-Propenoic acid, (3-ethyl-3-oxetanyl)methyl ester | 41988-14-1  |
| 25  | 4-Vinylphenyl Acetate                              | 2628-16-2   |
| 26  | Acrylamide Monomer                                 | 79-06-01    |
| 27  | 2-Acrylamido-2-methylpropanesulfonic Acid          | 15214-89-8  |
| 28  | Acrylic Acid                                       | 79-10-7     |
| 29  | Methyl Acrylate                                    | 96-33-3     |
| 30  | Isooctadecyl acrylate                              | 93841-48-6  |
| 31  | Isononyl Acrylate                                  | 51952-49-9  |
| 32  | Isobornyl Acrylate                                 | 5888-33-5   |
| 33  | Isobutyl Acrylate                                  | 106-63-8    |
| 34  | n-Octyl Acrylate                                   | 2499-59-4   |
| 35  | 1-Acryloyloxy-3-hydroxyadamantane                  | 216581-76-9 |
| 36  | 4-Hydroxybutyl Acrylate                            | 2478-10-6   |
| 37  | 2-[2-(Vinylloxy)ethoxy]ethyl acrylate              | 86273-46-3  |
| 38  | tert-Butyl acrylate                                | 1663-39-4   |
| 39  | Dicyclopentenylmethoxyethyl acrylate               | 65983-31-5  |
| 40  | 2-Methoxyethyl acrylate                            | 3121-61-7   |
| 41  | Dodecyl acrylate                                   | 2156-97-0   |
| 42  | Ethyl 3,3-diethoxyacrylate                         | 32002-24-7  |
| 43  | 1,4-Cyclohexanedimethanol monoacrylate             | 23117-36-4  |
| 44  | Stearyl acrylate                                   | 4813-57-4   |
| 45  | Tetrahydrofurfuryl acrylate                        | 2399-48-6   |
| 46  | 2-Hydroxyethyl acrylate                            | 818-61-1    |
| 47  | 2-hydroxypropyl acrylate                           | 999-61-1    |
| 48  | 4-Hydroxybutyl acrylate glycidyl ether             | 119692-59-0 |
| 49  | 2-Phenoxyethyl acrylate                            | 48145-04-6  |

**Examination 1 (Search for interpolated regions using double cross validation)**

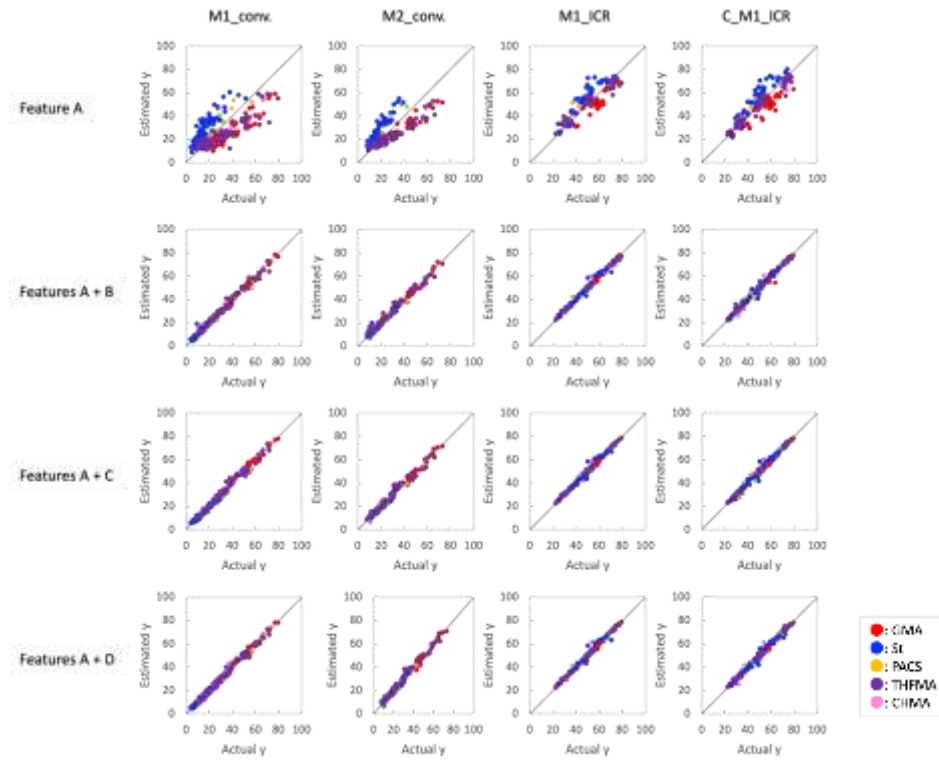

**Figure S4.** Plots of actual  $y$  vs. estimated  $y$  for each objective variable in  $v$ -SVR in interpolated region.

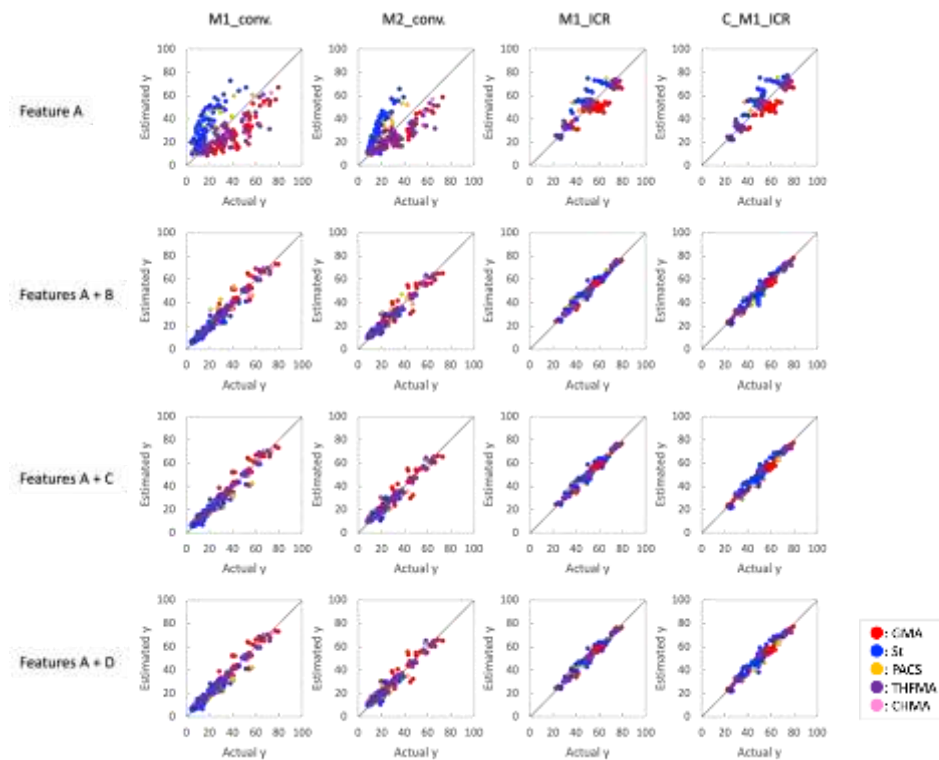

**Figure S5.** Plots of actual  $y$  vs. estimated  $y$  for each objective variable in RF in interpolated region.

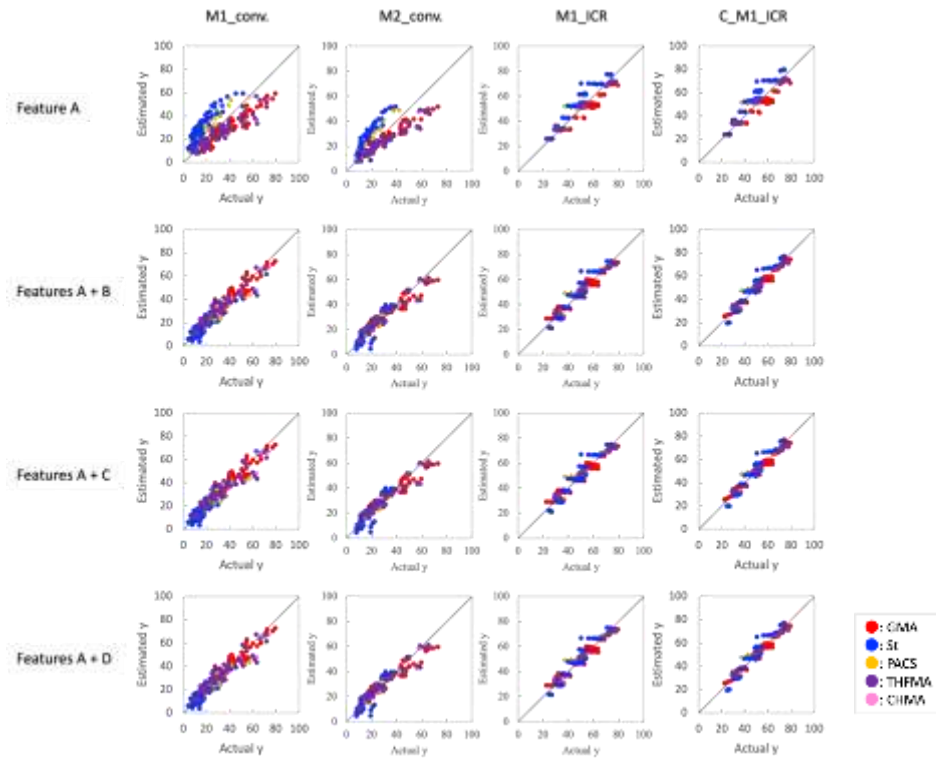

**Figure S6.** Plots of actual y vs. estimated y for each objective variable in PLS in interpolated region.

**Table S4.** Calculated  $R^2$  and MAE values for each model in interpolated region.

| Model | Feature sets | M1_conv.    |       | M2_conv.    |      | M1_ICR      |      | C_M1_ICR    |      |
|-------|--------------|-------------|-------|-------------|------|-------------|------|-------------|------|
|       |              | $R^2$       | MAE   | $R^2$       | MAE  | $R^2$       | MAE  | $R^2$       | MAE  |
| v-SVR | -            | 0.42        | 11.15 | 0.57        | 8.05 | <b>0.82</b> | 4.25 | <b>0.80</b> | 4.49 |
|       | A            | <b>0.99</b> | 1.43  | <b>0.98</b> | 1.42 | <b>0.99</b> | 0.85 | <b>0.98</b> | 1.04 |
|       | B            | <b>0.99</b> | 1.48  | <b>0.98</b> | 1.53 | <b>0.99</b> | 0.76 | <b>0.99</b> | 1.00 |
|       | D            | <b>0.99</b> | 1.42  | <b>0.98</b> | 1.40 | <b>0.99</b> | 0.82 | <b>0.99</b> | 1.05 |
| RF    | -            | 0.12        | 13.46 | 0.32        | 9.80 | 0.79        | 4.55 | 0.78        | 4.78 |
|       | A            | <b>0.95</b> | 2.57  | <b>0.94</b> | 2.40 | <b>0.98</b> | 1.39 | <b>0.96</b> | 1.91 |
|       | B            | <b>0.96</b> | 2.48  | <b>0.95</b> | 2.27 | <b>0.98</b> | 1.40 | <b>0.96</b> | 1.90 |
|       | D            | <b>0.96</b> | 2.49  | <b>0.95</b> | 2.27 | <b>0.98</b> | 1.39 | <b>0.96</b> | 1.92 |
| PLS   | -            | 0.49        | 10.48 | 0.57        | 7.75 | <b>0.87</b> | 3.66 | <b>0.87</b> | 3.73 |
|       | A            | <b>0.91</b> | 4.05  | <b>0.90</b> | 3.41 | <b>0.94</b> | 2.64 | <b>0.95</b> | 2.28 |
|       | B            | <b>0.91</b> | 4.05  | <b>0.90</b> | 3.40 | <b>0.94</b> | 2.65 | <b>0.95</b> | 2.30 |
|       | D            | <b>0.91</b> | 4.06  | <b>0.90</b> | 3.41 | <b>0.94</b> | 2.65 | <b>0.95</b> | 2.28 |

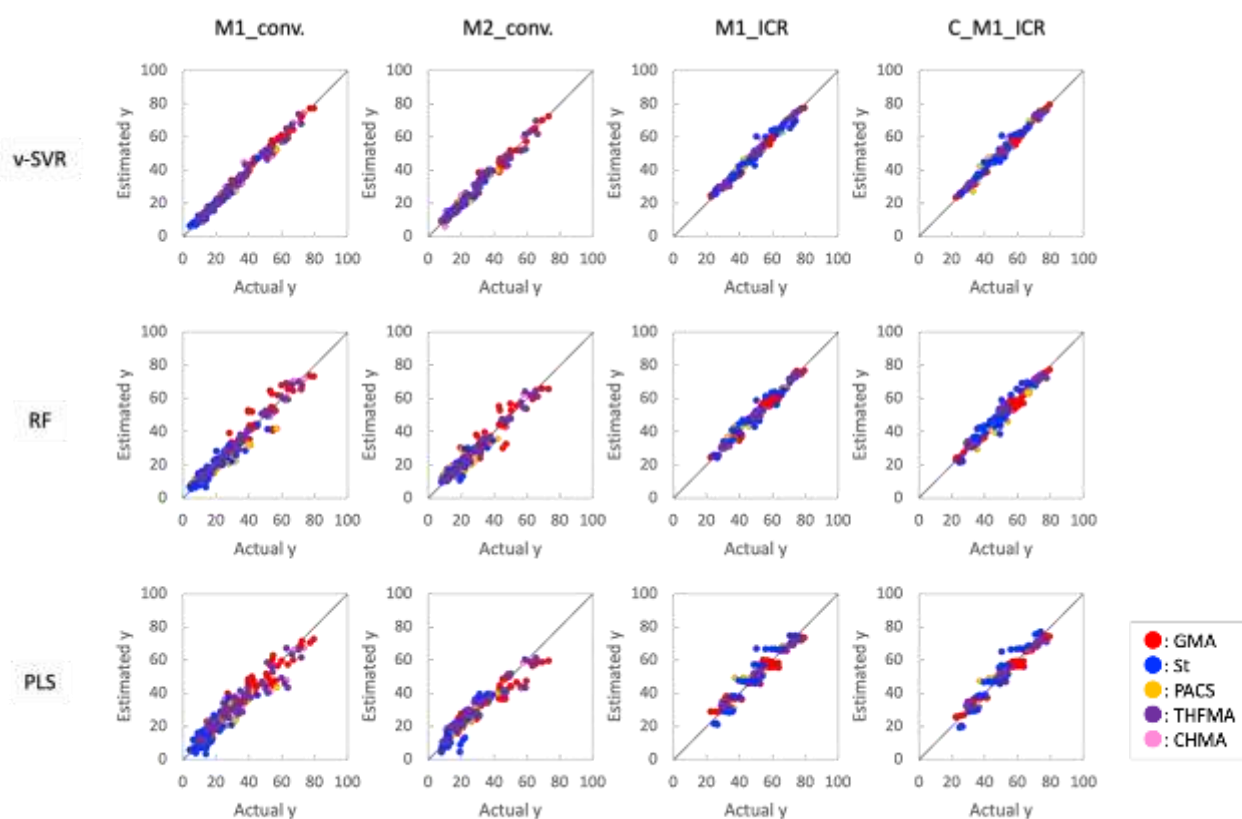

**Figure S7.** Plots of actual y vs. estimated y for each model using all objective variables (A + B + C + D) in interpolated region.

**Table S5.** Calculated  $R^2$  and MAE values for each model using all objective variables (A + B + C + D) in interpolated region.

| Model | Feature sets  | M1_conv.    |      | M2_conv.    |      | M1_ICR      |      | C_M1_ICR    |      |
|-------|---------------|-------------|------|-------------|------|-------------|------|-------------|------|
|       |               | $R^2$       | MAE  | $R^2$       | MAE  | $R^2$       | MAE  | $R^2$       | MAE  |
| v-SVR |               | <b>0.99</b> | 1.51 | <b>0.98</b> | 1.63 | <b>0.99</b> | 0.96 | <b>0.99</b> | 1.03 |
| RF    | A + B + C + D | <b>0.95</b> | 2.49 | <b>0.95</b> | 2.27 | <b>0.98</b> | 1.40 | <b>0.93</b> | 1.90 |
| PLS   |               | <b>0.91</b> | 4.05 | <b>0.90</b> | 3.40 | <b>0.94</b> | 2.64 | <b>0.95</b> | 2.29 |

## Examination 2 (Search for extrapolated regions using molecular extrapolation validation)

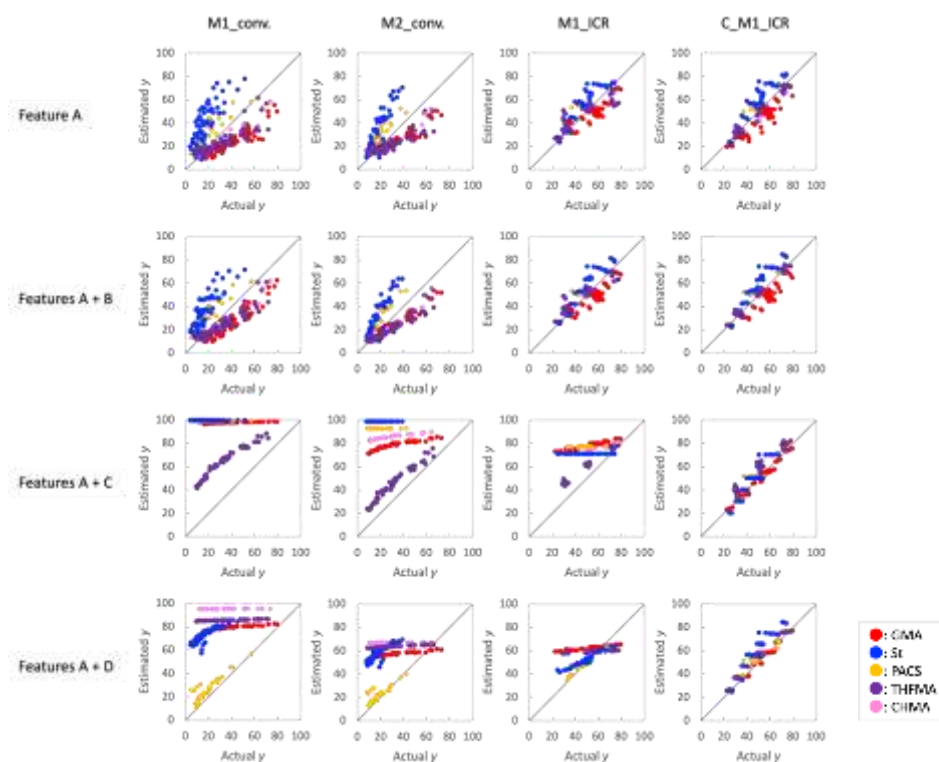

**Figure S8.** Plots of actual  $y$  vs. estimated  $y$  for each objective variable in v-SVR in extrapolated region.

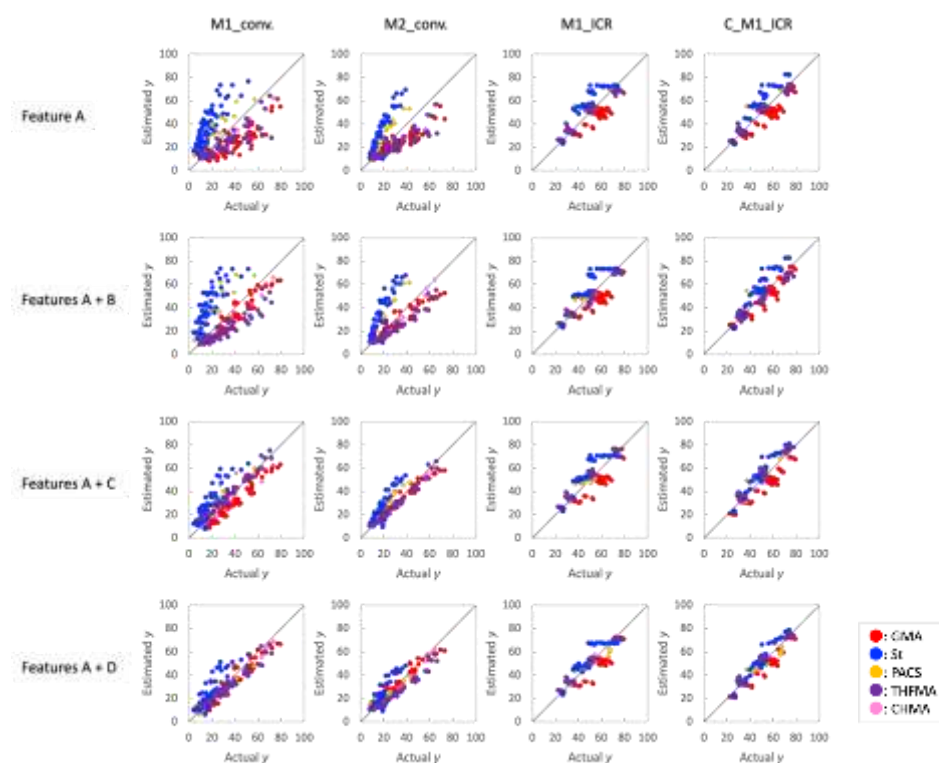

**Figure S9.** Plots of actual  $y$  vs. estimated  $y$  for each objective variable in RF in extrapolated region.

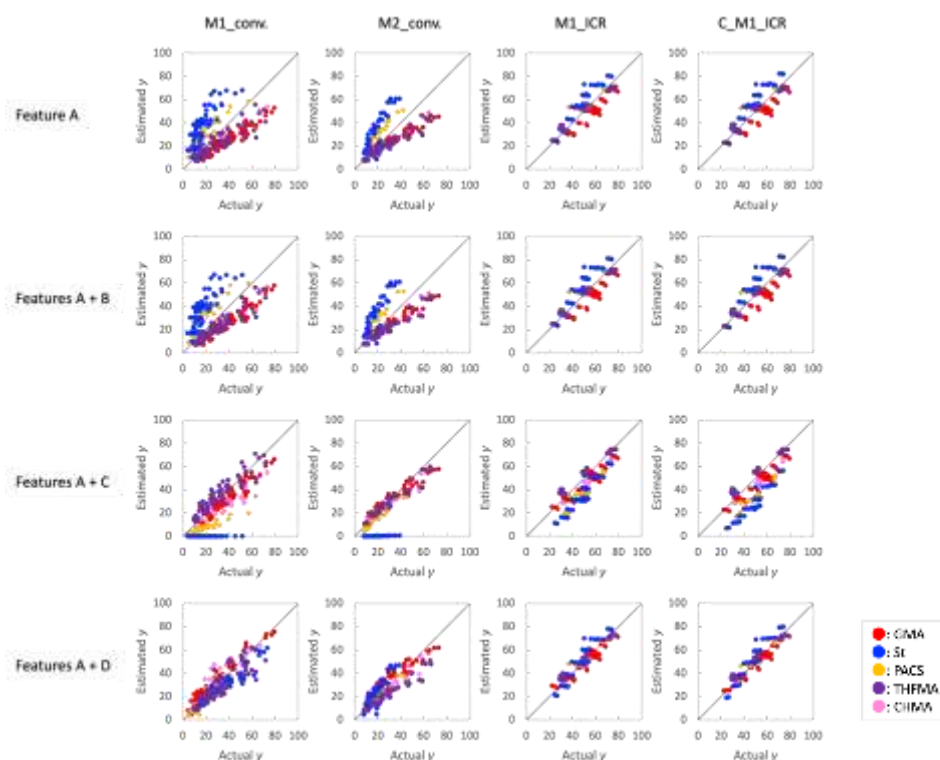

**Figure S10.** Plots of actual  $y$  vs. estimated  $y$  for each objective variable in PLS in extrapolated region.

**Table S6.** Calculated  $R^2$  and MAE values for each model in extrapolated region.

| Model | Feature sets | M1_conv.    |       | M2_conv.    |       | M1_ICR      |       | C_M1_ICR    |       |
|-------|--------------|-------------|-------|-------------|-------|-------------|-------|-------------|-------|
|       |              | $R^2$       | MAE   | $R^2$       | MAE   | $R^2$       | MAE   | $R^2$       | MAE   |
| v-SVR | -            | -0.11       | 15.15 | 0.17        | 10.61 | 0.65        | 6.07  | 0.71        | 5.42  |
|       | A            | 0.17        | 13.43 | 0.34        | 9.75  | 0.74        | 5.16  | 0.77        | 4.80  |
|       | B            | -13.3       | 60.69 | -14.9       | 51.54 | -2.33       | 21.60 | <b>0.85</b> | 3.96  |
|       | D            | -7.18       | 44.82 | -4.13       | 29.28 | 0.01        | 10.17 | 0.79        | 4.91  |
| RF    | -            | -0.03       | 14.63 | 0.21        | 10.46 | 0.73        | 5.26  | 0.74        | 5.20  |
|       | A            | 0.04        | 13.72 | 0.23        | 10.08 | 0.73        | 5.31  | 0.81        | 4.53  |
|       | B            | 0.66        | 8.17  | <b>0.82</b> | 4.71  | 0.76        | 5.01  | 0.79        | 5.05  |
|       | D            | <b>0.84</b> | 5.46  | <b>0.84</b> | 4.26  | <b>0.81</b> | 3.97  | <b>0.88</b> | 3.46  |
| PLS   | -            | 0.10        | 13.81 | 0.29        | 9.89  | 0.79        | 4.78  | 0.79        | 4.80  |
|       | A            | 0.17        | 13.41 | 0.33        | 9.69  | <b>0.80</b> | 4.62  | 0.79        | 4.66  |
|       | B            | 0.42        | 10.34 | 0.49        | 7.26  | 0.42        | 8.53  | 0.06        | 10.42 |
|       | D            | <b>0.81</b> | 5.64  | 0.76        | 5.53  | <b>0.89</b> | 3.53  | <b>0.90</b> | 3.20  |

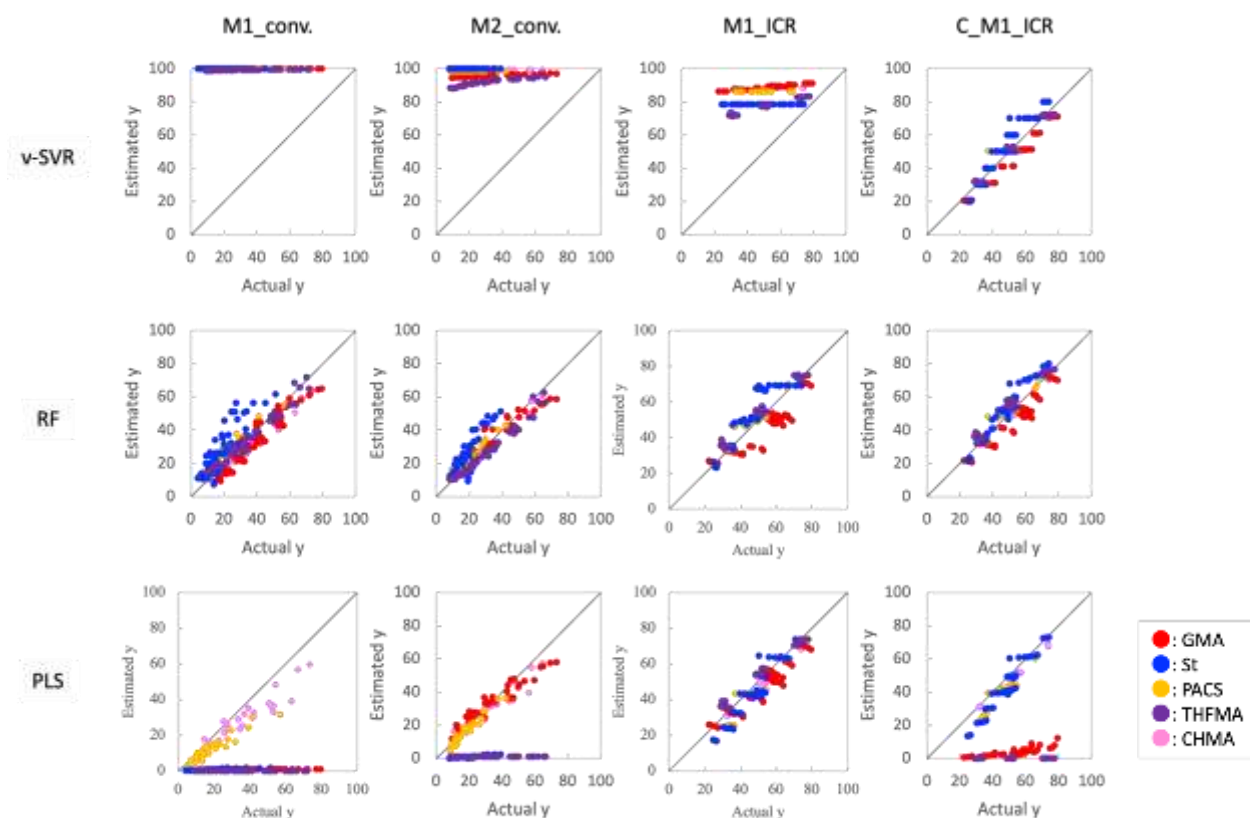

**Figure S11.** Plots of actual y vs. estimated y for each model using all objective variables (A + B + C + D) in extrapolated region.

**Table S7.** Calculated  $R^2$  and MAE values for each model using all objective variables (A + B + C + D) in extrapolated region.

| Model | Feature sets  | M1_conv. |       | M2_conv.    |       | M1_ICR      |       | C_M1_ICR    |       |
|-------|---------------|----------|-------|-------------|-------|-------------|-------|-------------|-------|
|       |               | $R^2$    | MAE   | $R^2$       | MAE   | $R^2$       | MAE   | $R^2$       | MAE   |
| v-SVR |               | -16.55   | 69.80 | -23.38      | 70.09 | -5.71       | 32.54 | <b>0.86</b> | 3.94  |
| RF    | A + B + C + D | 0.77     | 6.58  | <b>0.85</b> | 4.48  | 0.79        | 4.48  | <b>0.85</b> | 4.16  |
| PLS   |               | -2.21    | 24.86 | -0.75       | 13.18 | <b>0.81</b> | 4.92  | -6.92       | 29.21 |

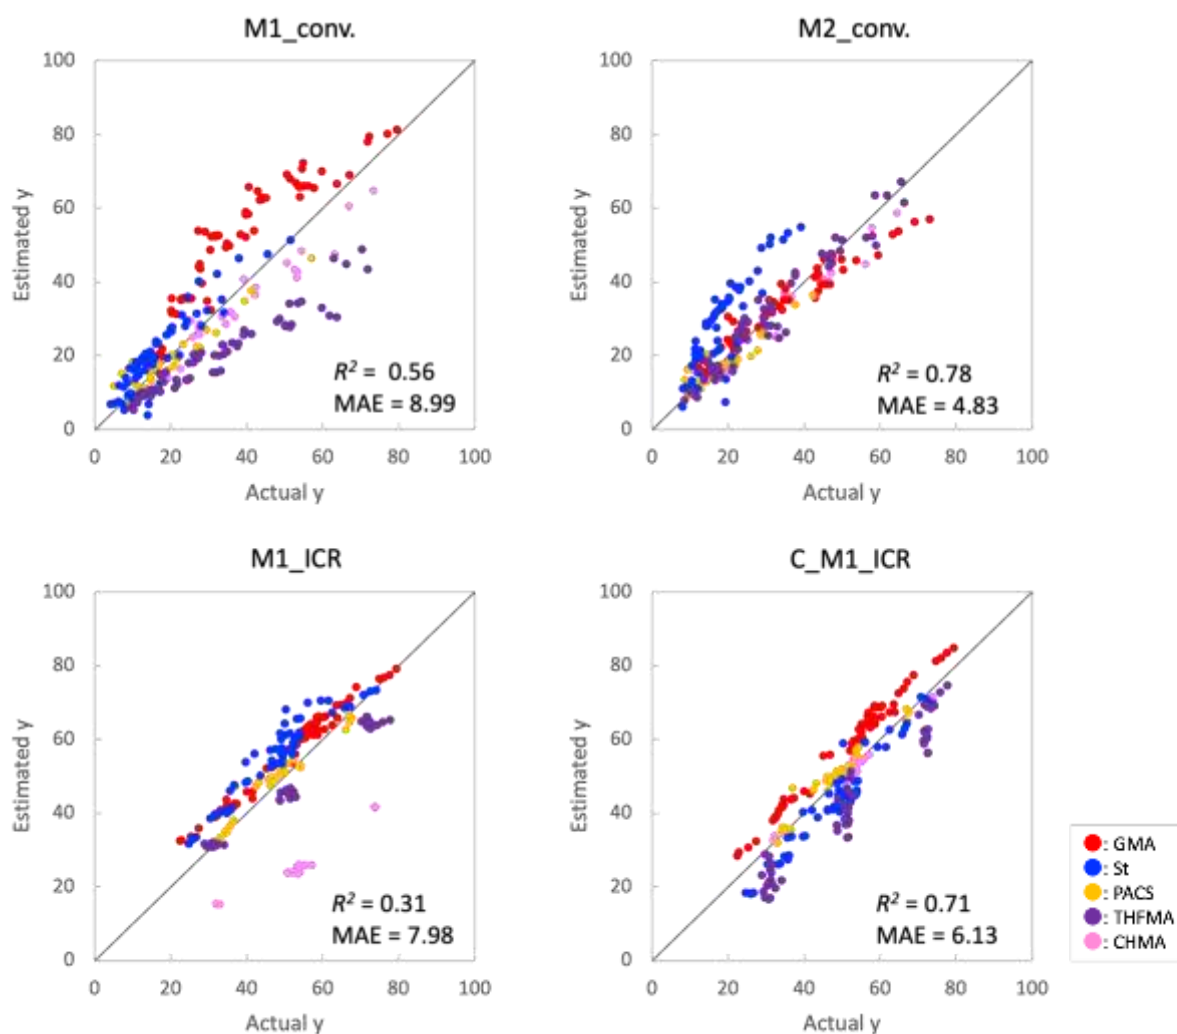

**Figure S12.** Plots of actual y vs. estimated y for the neural network using feature A + D in extrapolated region.

Model Architecture: contains 256 neurons in the first hidden layer, 64 neurons in the second hidden layer, and 16 neurons in the third hidden layer with 200 iterations (max).



**Recursive feature elimination (RFE)**

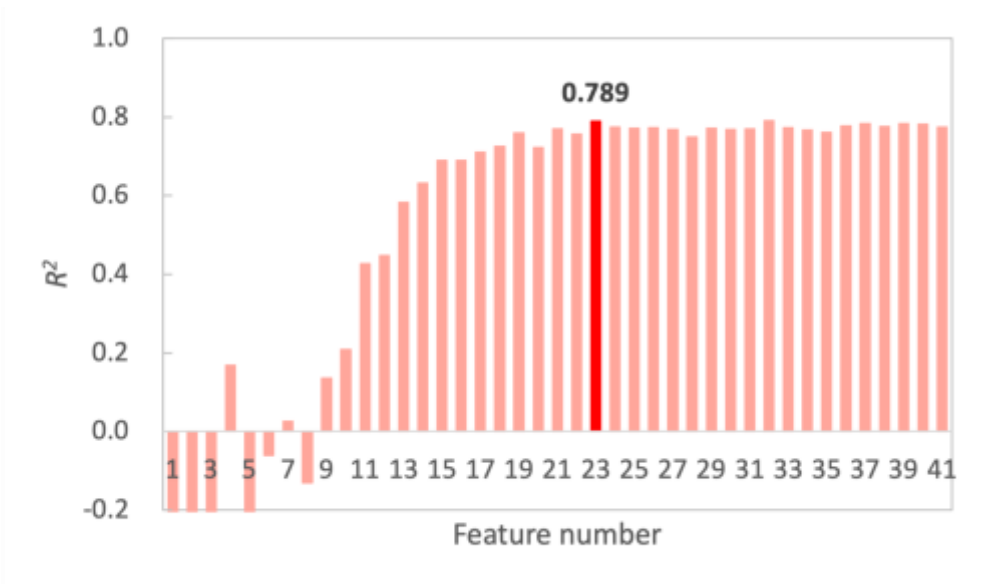

**Figure S13.** Calculated  $R^2$  for each feature.

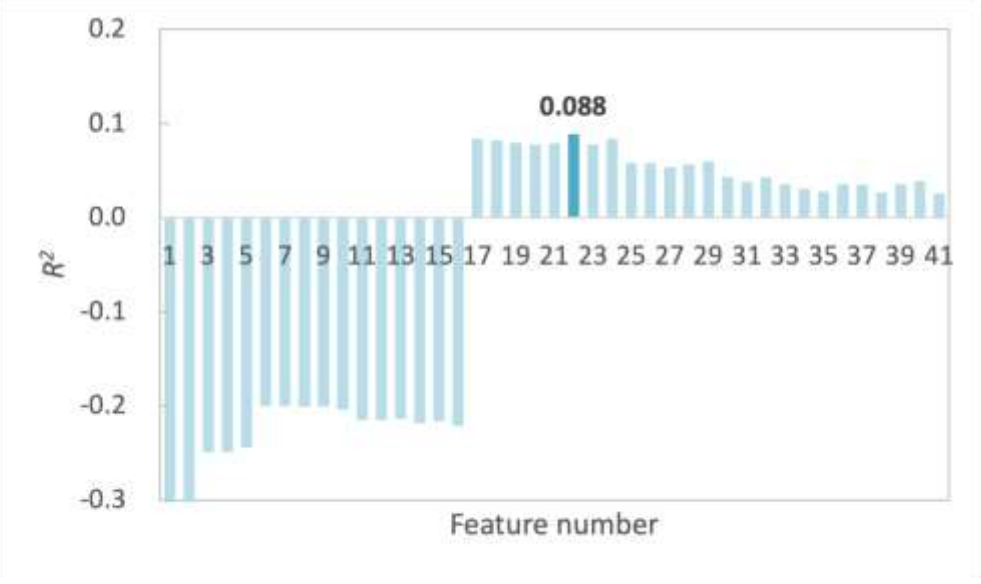

**Figure S14.** Calculated  $R^2$  for each feature.

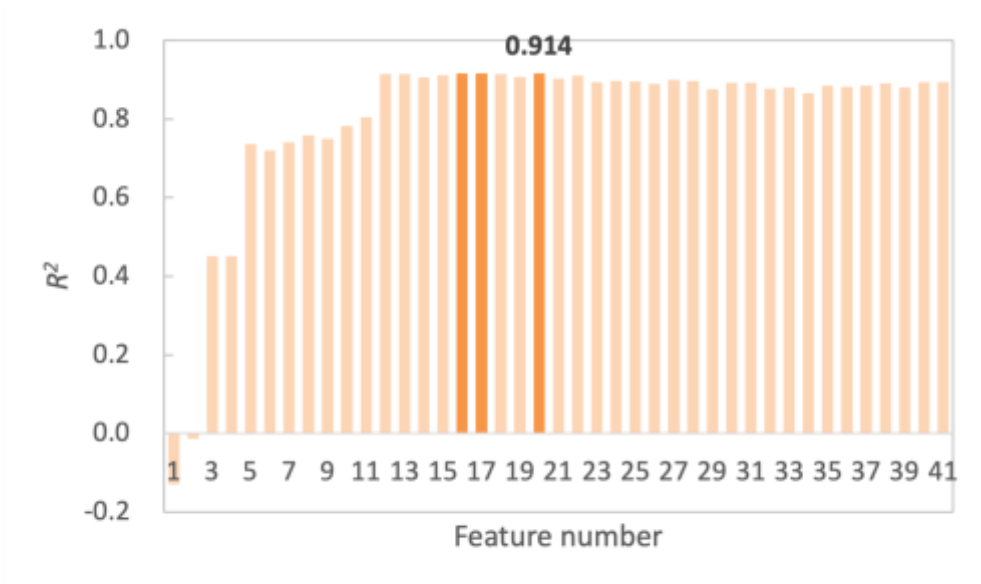

**Figure S15.** Calculated  $R^2$  for each feature

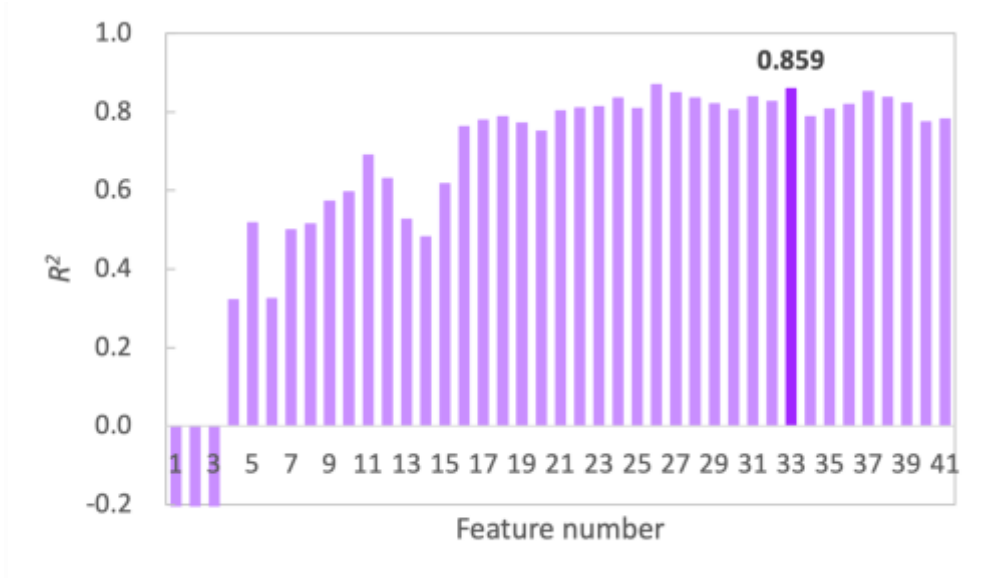

**Figure S16.** Calculated  $R^2$  for each feature.

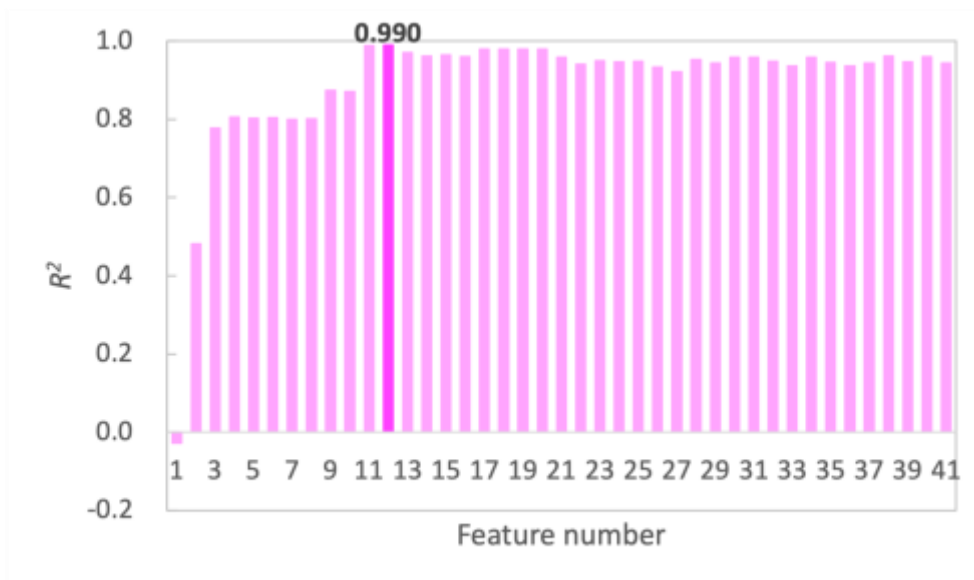

**Figure S17.** Calculated  $R^2$  for each feature.

## Explanatory variables

**Table S8.** List of parameters calculated by DFT method.

| Monomer                  | GMA          | St           | CHMA         | THFMA        | PACS         |
|--------------------------|--------------|--------------|--------------|--------------|--------------|
| DE_M00_TS_theta60        | -0.003015671 | 0.000453725  | -0.009129773 | -0.005293026 | 0.000555753  |
| Real_theta_M00_theta60   | 70.23564207  | 56.15353136  | 72.17562408  | 51.25233077  | 54.50603002  |
| DE_M00_TS_theta180       | -0.005512013 | -0.002199144 | -0.005819303 | -0.005126284 | -0.002725805 |
| Real_theta_M00_theta180  | 173.2057863  | 178.3675235  | 189.8003006  | 204.3511202  | 177.7359104  |
| DE_M00_TS_theta300       | -0.004917453 | -0.000958591 | -0.007041858 | -0.004227422 | -0.000846792 |
| Real_theta_M00_theta300  | 305.4991493  | 308.446018   | 324.7409414  | 308.213834   | 308.1126372  |
| DE_00M_TS_theta60        | -0.004686666 | -0.002790514 | -0.005954314 | -0.003727761 | -0.002996113 |
| Real_theta_00M_theta60   | 74.6871307   | 60.12718366  | 41.13362743  | 51.46198515  | 59.7782855   |
| DE_00M_TS_theta180       | -0.007332908 | -0.004174637 | -0.005377352 | -0.005700981 | -0.004324217 |
| Real_theta_00M_theta180  | 156.2884273  | 208.3674353  | 182.8188912  | 171.7563309  | 208.3641054  |
| DE_00M_TS_theta300       | -0.006948181 | -0.002935987 | -0.009390278 | -0.006105677 | -0.003096496 |
| Real_theta_00M_theta300  | 308.3303933  | 291.6177967  | 289.5383495  | 311.6937046  | 290.1038477  |
| DE_MM_TS_theta60         | -0.004612167 | 0.001509026  | -0.007397412 | -0.006006008 | 0.001635736  |
| Real_theta_MM_theta60    | 79.76837866  | 57.2356454   | 80.5529613   | 39.68781394  | 62.05845262  |
| DE_MM_TS_theta180        | -0.008853995 | -0.000525124 | -0.011625977 | -0.007061631 | -0.008330683 |
| Real_theta_MM_theta180   | 164.6841998  | 176.5712775  | 174.9017246  | 180.1318468  | 173.2780436  |
| DE_MM_TS_theta300        | -0.01027043  | 0.001540489  | -0.006675079 | -0.004991215 | 0.001424407  |
| Real_theta_MM_theta300   | 258.2276633  | 291.4854858  | 271.0157861  | 284.4189013  | 292.6451545  |
| E_M_Rad_SOMO             | -0.22108451  | -0.178146229 | -0.21339748  | -0.216737169 | -0.175182529 |
| E_M_Rad_LUMO             | 0.035405137  | -0.009196424 | 0.040121638  | 0.038501022  | -0.0150155   |
| E_M_Mon_HOMO             | -0.275241871 | -0.230830579 | -0.271586573 | -0.253740925 | -0.225539183 |
| E_M_Mon_LUMO             | -0.052799579 | -0.042225132 | -0.044570869 | -0.048291459 | -0.045912177 |
| DE_M_decomposition_head  | 0.062134228  | 0.063061185  | 0.061804369  | 0.061256585  | 0.063245575  |
| DE_M_decomposition_tail  | 0.038719349  | 0.038749391  | 0.039385516  | 0.037937566  | 0.038492683  |
| E_00_Rad_SOMO            | -0.214231645 | -0.214231645 | -0.214231645 | -0.214231645 | -0.214231645 |
| E_00_Rad_LUMO            | 0.044572116  | 0.044572116  | 0.044572116  | 0.044572116  | 0.044572116  |
| E_00_Mon_HOMO            | -0.273330301 | -0.273330301 | -0.273330301 | -0.273330301 | -0.273330301 |
| E_00_Mon_LUMO            | -0.045363064 | -0.045363064 | -0.045363064 | -0.045363064 | -0.045363064 |
| DE_00_decomposition_head | 0.061518379  | 0.061518379  | 0.061518379  | 0.061518379  | 0.061518379  |
| DE_00_decomposition_tail | 0.0385338    | 0.0385338    | 0.0385338    | 0.0385338    | 0.0385338    |
| DE_M00_SHgap             | 0.052245791  | 0.095184072  | 0.059932821  | 0.056593132  | 0.098147772  |
| DE_M00_SLgap             | 0.175721446  | 0.132783165  | 0.168034416  | 0.171374105  | 0.129819465  |
| DE_00M_SHgap             | 0.061010226  | 0.016598934  | 0.057354928  | 0.03950928   | 0.011307538  |
| DE_00M_SLgap             | 0.161432066  | 0.172006513  | 0.169660776  | 0.165940187  | 0.168319468  |
| DE_MM_SHgap              | 0.054157361  | 0.05268435   | 0.058189093  | 0.037003756  | 0.050356654  |
| DE_MM_SLgap              | 0.168284931  | 0.135921097  | 0.168826611  | 0.168445711  | 0.129270352  |

## References

S1) Chemical Daily Co. Ltd., Chemical products handbook-17019. Chemical Daily Co. Ltd., Tokyo, 2019 (in Japanese).
